# Supplementary material for: Understanding the molecular mechanisms of odorant binding and activation of the human OR52 family
Source: PubMed Central journal article supplement (PMC10703812; doi:10.1038/s41467-023-43983-9), 2023-12-07

# **Understanding the molecular mechanisms of odorant binding and activation of the human OR52 family**

Chulwon Choi<sup>†</sup>, Jungnam Baet<sup>†</sup>, Seonghan Kim, Seho Lee,  
Hyunook Kang, Jinuk Kim, Injin Bang, Kiheon Kim, Won-Ki Huh,  
Chaok Seok, Hahnbeom Park, Wonpil Im, Hee-Jung Choi<sup>\*</sup>

Supplementary Figure 1-16

Supplementary Table 1-6

References

MD simulation checklist

Uncropped gel images



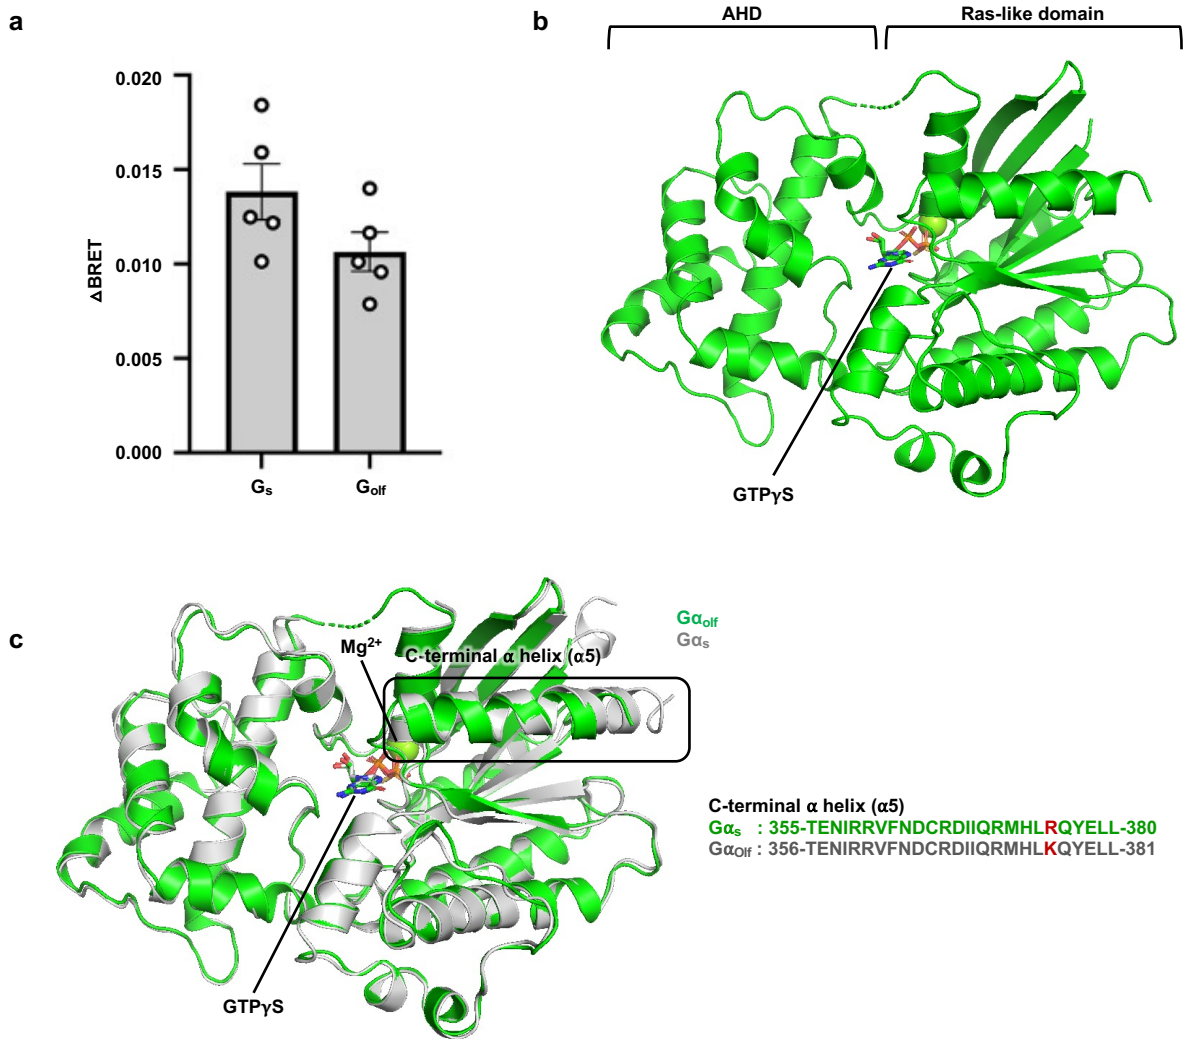

**Supplementary Fig. 2] Structural similarity between G $\alpha_s$  and G $\alpha_{if}$ .** **a** OCA-induced G protein recruitment to OR52<sub>cs</sub> was assessed with Bioluminescence Resonance Energy Transfer (BRET) assay.  $\Delta$ BRET is calculated by the difference between 500  $\mu$ M OCA- and vehicle-treated BRET signals. Bars and error bars indicate the mean and S.E.M. from  $n=5$  independent experiments, respectively, and symbols indicate individual values. **b** The crystal structure of GTP $\gamma$ S-bound G $\alpha_{if}$  is shown. Two domains of G $\alpha_{if}$ , AHD and Ras-like domain are indicated. **c** Structural alignment of G $\alpha_{if}$  with a previously reported crystal structure of human G $\alpha_s$ <sup>4</sup> (PDB ID 1AZT). The structure of G $\alpha_{if}$  and G $\alpha_s$  are colored in green and white, respectively. Two structures showed a RMSD of 0.48 Å for 285 C $\alpha$  atoms, and GTP $\gamma$ S is located at the same position. Box highlights the  $\alpha 5$  helices of the two G $\alpha$  structures.

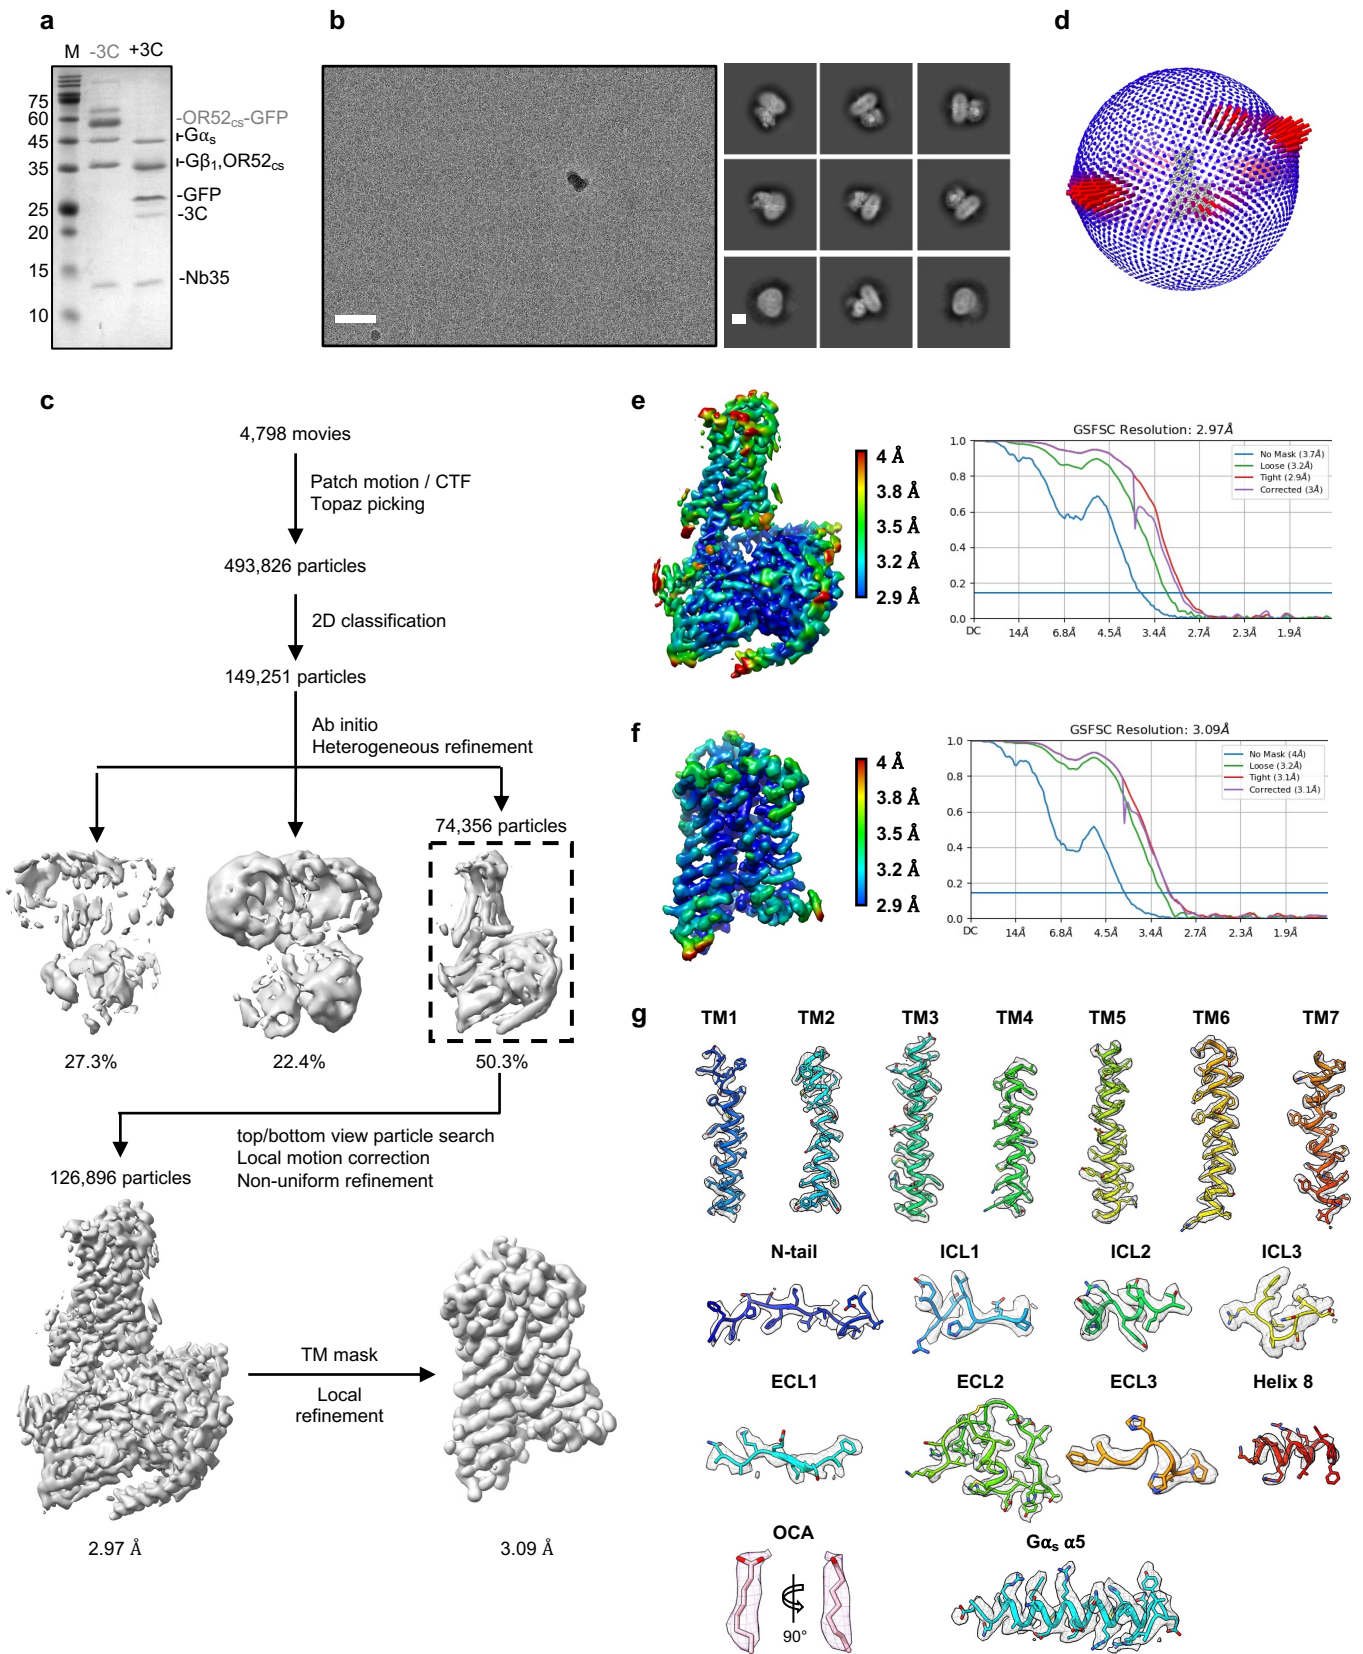

**Supplementary Fig. 3 Processing of cryo-EM data of the OCA-OR52<sub>cs</sub>-G<sub>s</sub>-Nb35 complex.** **a** SDS-PAGE of purified OCA-OR52<sub>cs</sub>-G<sub>s</sub>-Nb35 complex before and after HRV3C protease treatment. **b** Representative motion-corrected micrograph (scale bar, 50 nm) and 2D average classes (scale bar, 5 nm) of the complex are shown. **c** Flowchart of data processing using cryoSPARC v3.3.2<sup>5,6</sup>. **d** The Euler angle distribution of particles used in final non-uniform refinement. **e-f** Cryo-EM maps colored by local resolution of Non-uniform refinement (**e**) and receptor-focused local refinement (**f**). **g** Density representation of TMs, N-tail, ECL1-3, ICL1-3, helix 8, and Gα<sub>s</sub> α5 helix are shown.



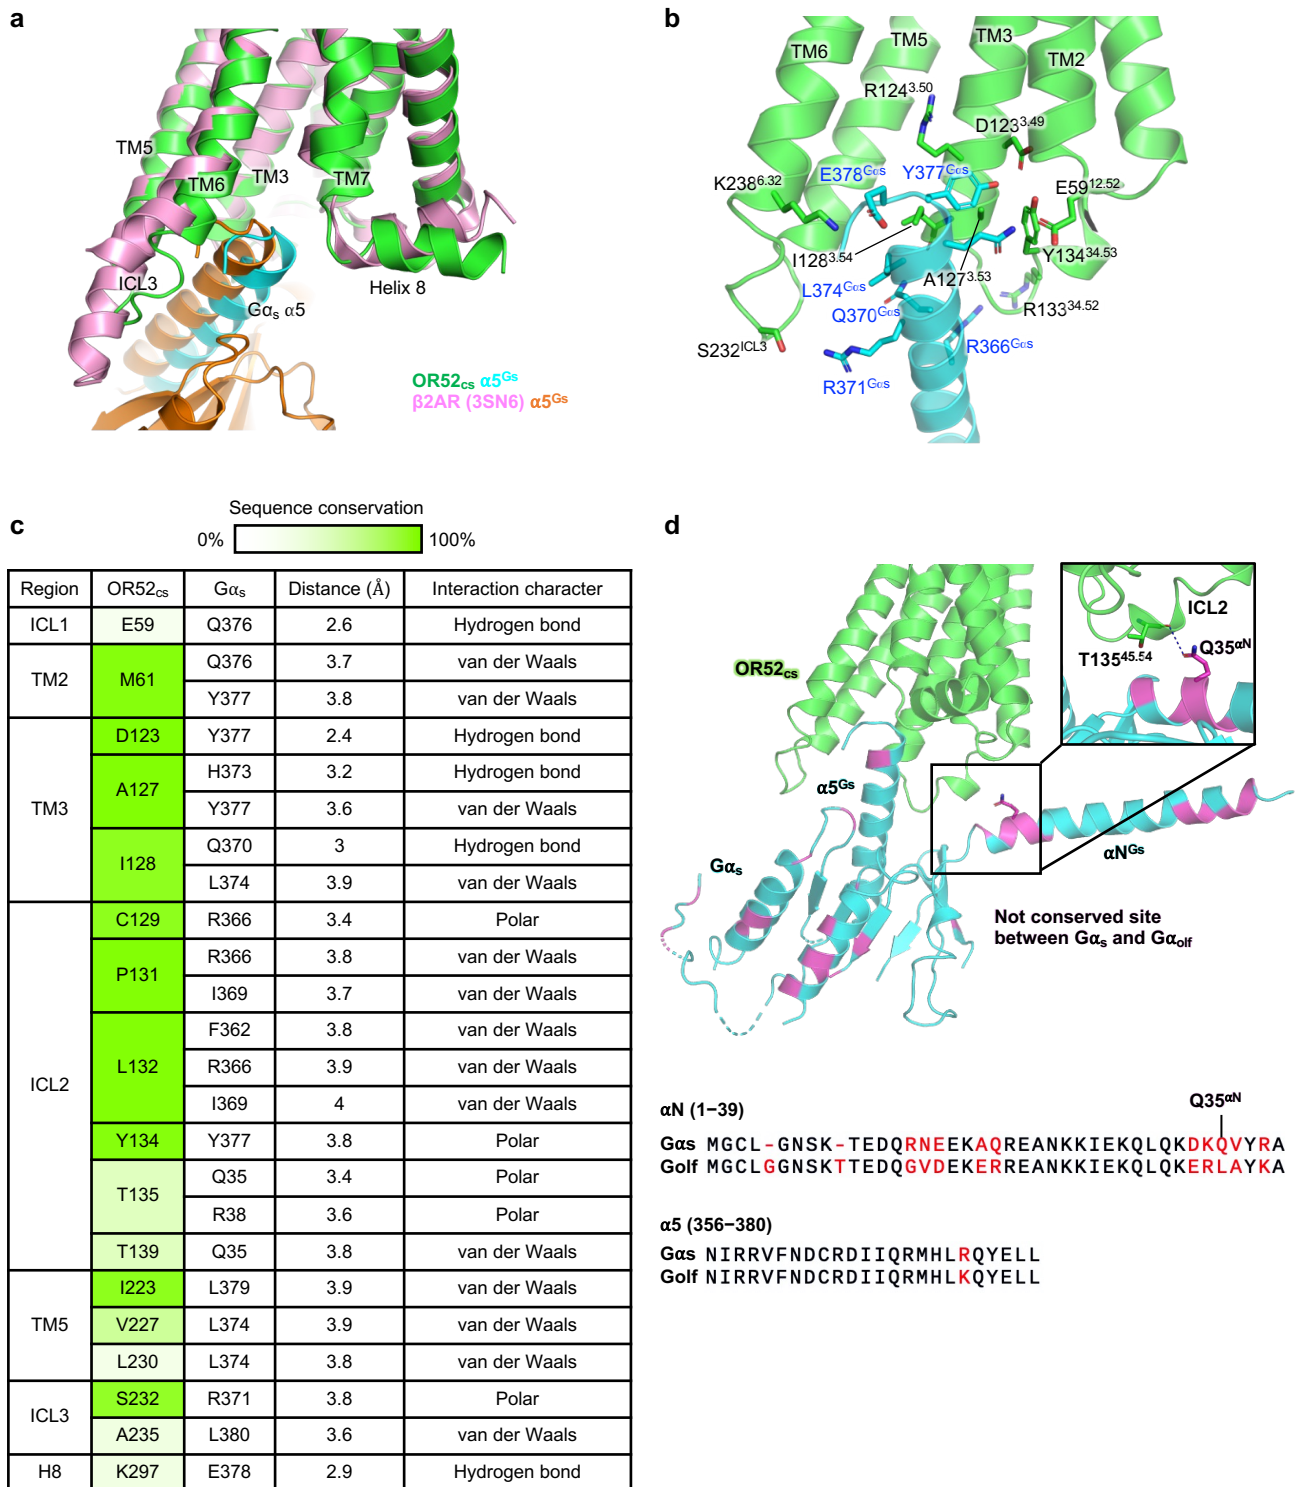

**Supplementary Fig. 4| G protein binding interface of OR52<sub>cs</sub>.** **a** Comparison of Gα<sub>s</sub> binding site between OR52<sub>cs</sub> and β2AR (PDB: 3SN6). **b** Interaction interface of OR52<sub>cs</sub> and α5 helix of Gα<sub>s</sub>. Residues that participate in the interaction are shown as sticks. **c** Interactions between OR52<sub>cs</sub> and Gα<sub>s</sub>, determined by the PyMol program (Molecular Graphics System v2.5.1, Schrödinger) are summarized. For each interaction, distance (Å) and character are displayed. For each residue of OR52<sub>cs</sub>, the degree of conservation among whole 388 human ORs is color-coded. **d** Residues that are not conserved in Gα<sub>olf</sub> are highlighted in magenta in the structure of Gα<sub>s</sub>. Q35<sup>αN</sup> of Gα<sub>s</sub> is replaced with L37<sup>αN</sup> in Gα<sub>olf</sub>. For αN and α5 helices, sequence alignment between Gα<sub>s</sub> and Gα<sub>olf</sub> is shown at the bottom. Residues that differ between Gα<sub>olf</sub> and Gα<sub>s</sub> are colored red. All the Gα<sub>s</sub> residues that interact with OR52<sub>cs</sub>, except for Q35<sup>αN</sup> are conserved in Gα<sub>olf</sub>. Q35<sup>αN</sup> is replaced with L37<sup>αN</sup> in Gα<sub>olf</sub>, which will lose polar contact with the carbonyl group of T135<sup>34,54</sup>.

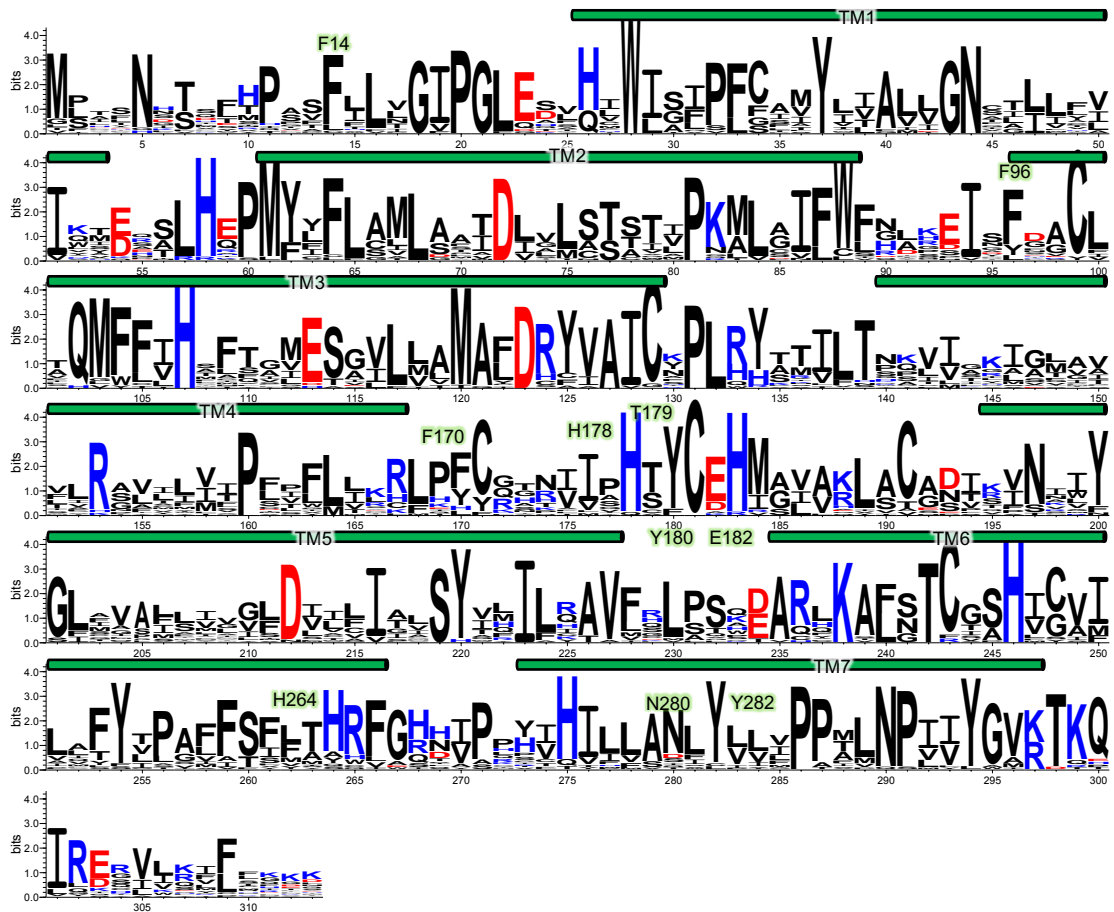

**Supplementary Fig. 5| Sequence conservation of the human OR52 family.** Sequence conservation of 26 human OR52 family members are shown. The position of each TM for OR52<sub>CS</sub> is shown. For each position, the residue number corresponds to that of OR52<sub>CS</sub>. Conserved residues contributing to structural stability mentioned in Fig. 2b-d are marked with green text.

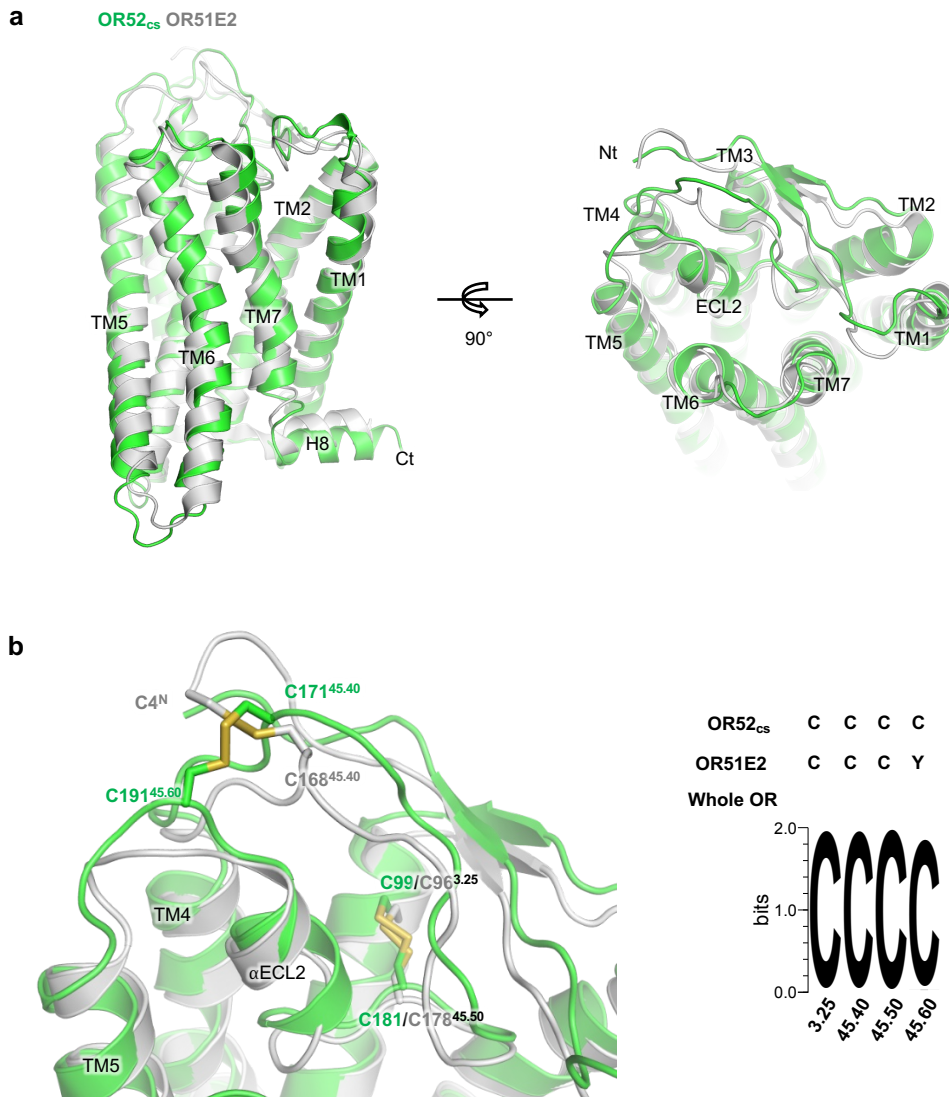

**Supplementary Fig. 6| Structural comparison of OR52<sub>cs</sub> and OR51E2.** **a** Active state OR52<sub>cs</sub> structure was aligned to OR51E2 (PDB:8F76) with a RMSD of 1.5 Å for 289 C $\alpha$  atoms. **b** One of disulfide bonds are not conserved between the two structures. In OR51E2, highly conserved C<sup>45,60</sup> is replaced with Y.

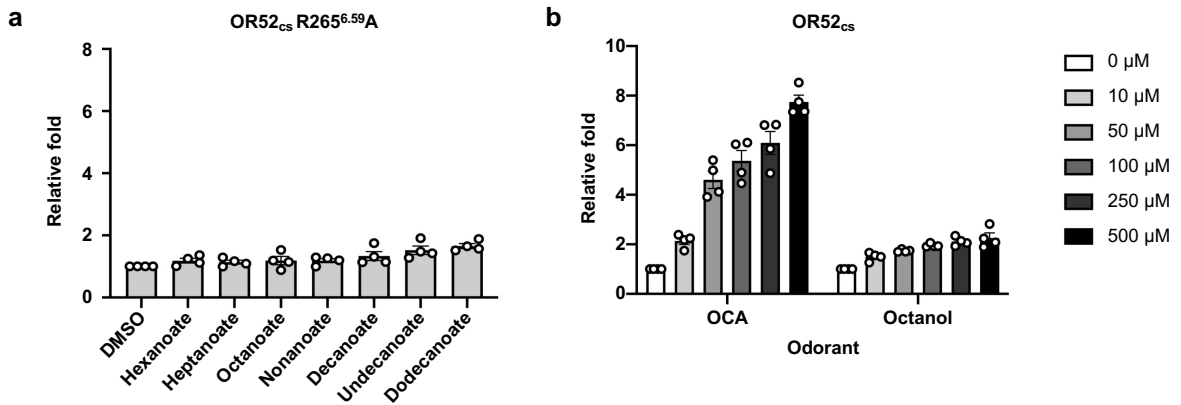

**Supplementary Fig. 7 | CRE assays of R265<sup>6.59A</sup> mutant and OR52<sub>cs</sub> with octanol.** **a** The activity of the OR52<sub>cs</sub> R265<sup>6.59A</sup> mutant in response to the treatment of carboxylic acid odorants was assessed with CRE luciferase assay. Different lengths of carboxylic acids were treated at a final concentration of 100 μM. DMSO was used as negative control. Bars and error bars indicate the mean and S.E.M. of 4 independent experiments, respectively, and symbols indicate individual values. The relative fold was calculated by dividing the luciferase activity of each odorant with that of DMSO. Assays were done with Hana3A cell line and data were analyzed by GraphPad Prism 9.4.1. **b** The activity of OR52<sub>cs</sub> in response to OCA and octanol was assessed with CRE luciferase assay. Odorants were treated at five different concentrations as indicated on the right. Bars and error bars indicate the mean and S.E.M. of 4 independent experiments, respectively.

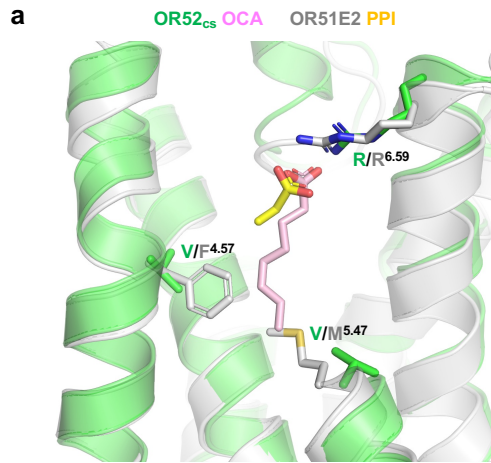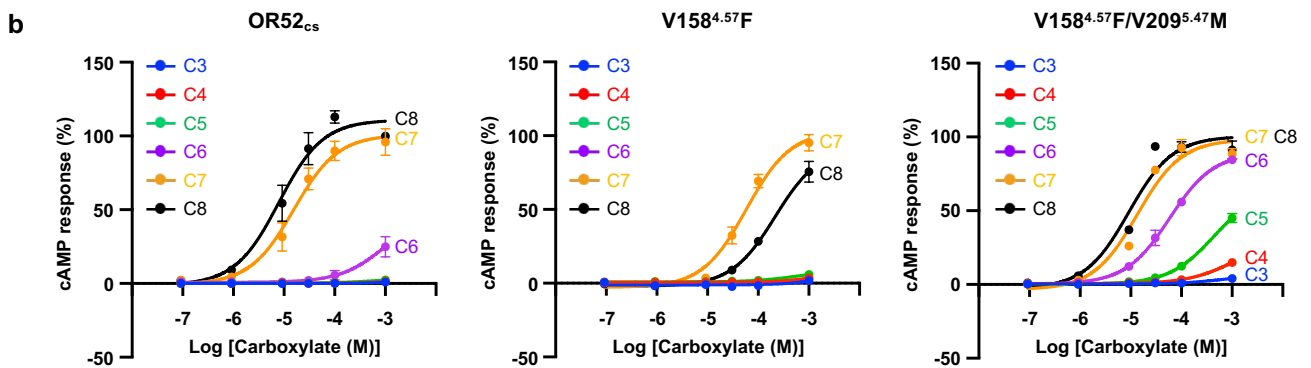

**Supplementary Fig. 8 | Mutagenesis of odorant pocket residues of OR52<sub>cs</sub>.** **a.** Structural alignment of OR52<sub>cs</sub> with OR51E2 is shown. OR51E2 is colored light-gray and PPI is shown as a yellow stick. Residues at positions 4.57, 5.47, and 6.59 are shown as sticks. **b.** Carboxylic acid odorants with various lengths were treated to OR52<sub>cs</sub> and two mutants (V158<sup>4.57</sup>F and V158<sup>4.57</sup>F/V209<sup>5.47</sup>M), and their cAMP response curves are shown. For each data, symbols and error bars indicate the mean and the standard error of the mean (S.E.M.) from n=3 independent experiments, respectively.



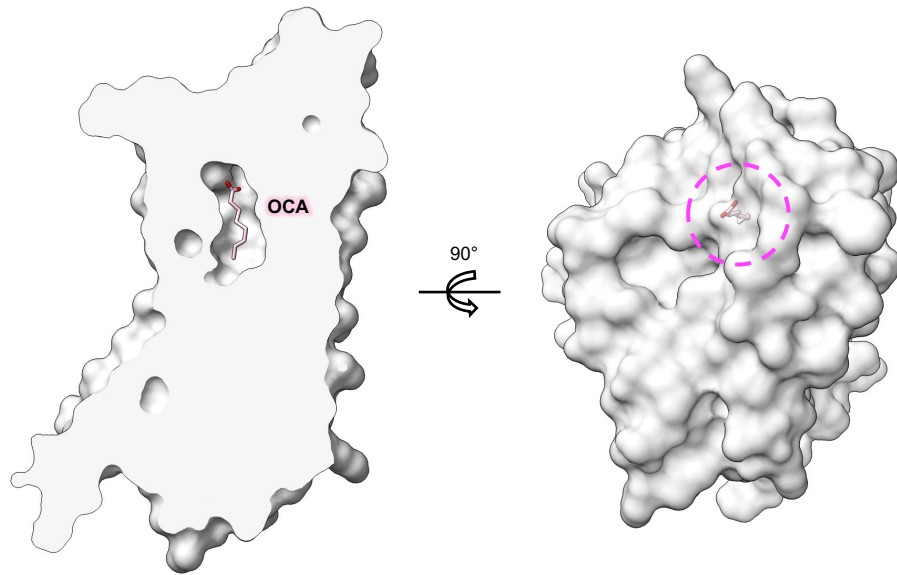

**Supplementary Fig. 9| The odorant binding pocket of OR52<sub>cs</sub>.** The odorant binding pocket of OR52<sub>cs</sub> is shown using UCSF ChimeraX 1.6.17. The surface model of the active OR52<sub>cs</sub> (light-gray) is shown and OCA (lightpink) is presented as sticks. Occluded odorant-binding pocket is indicated by a magenta dashed circle.

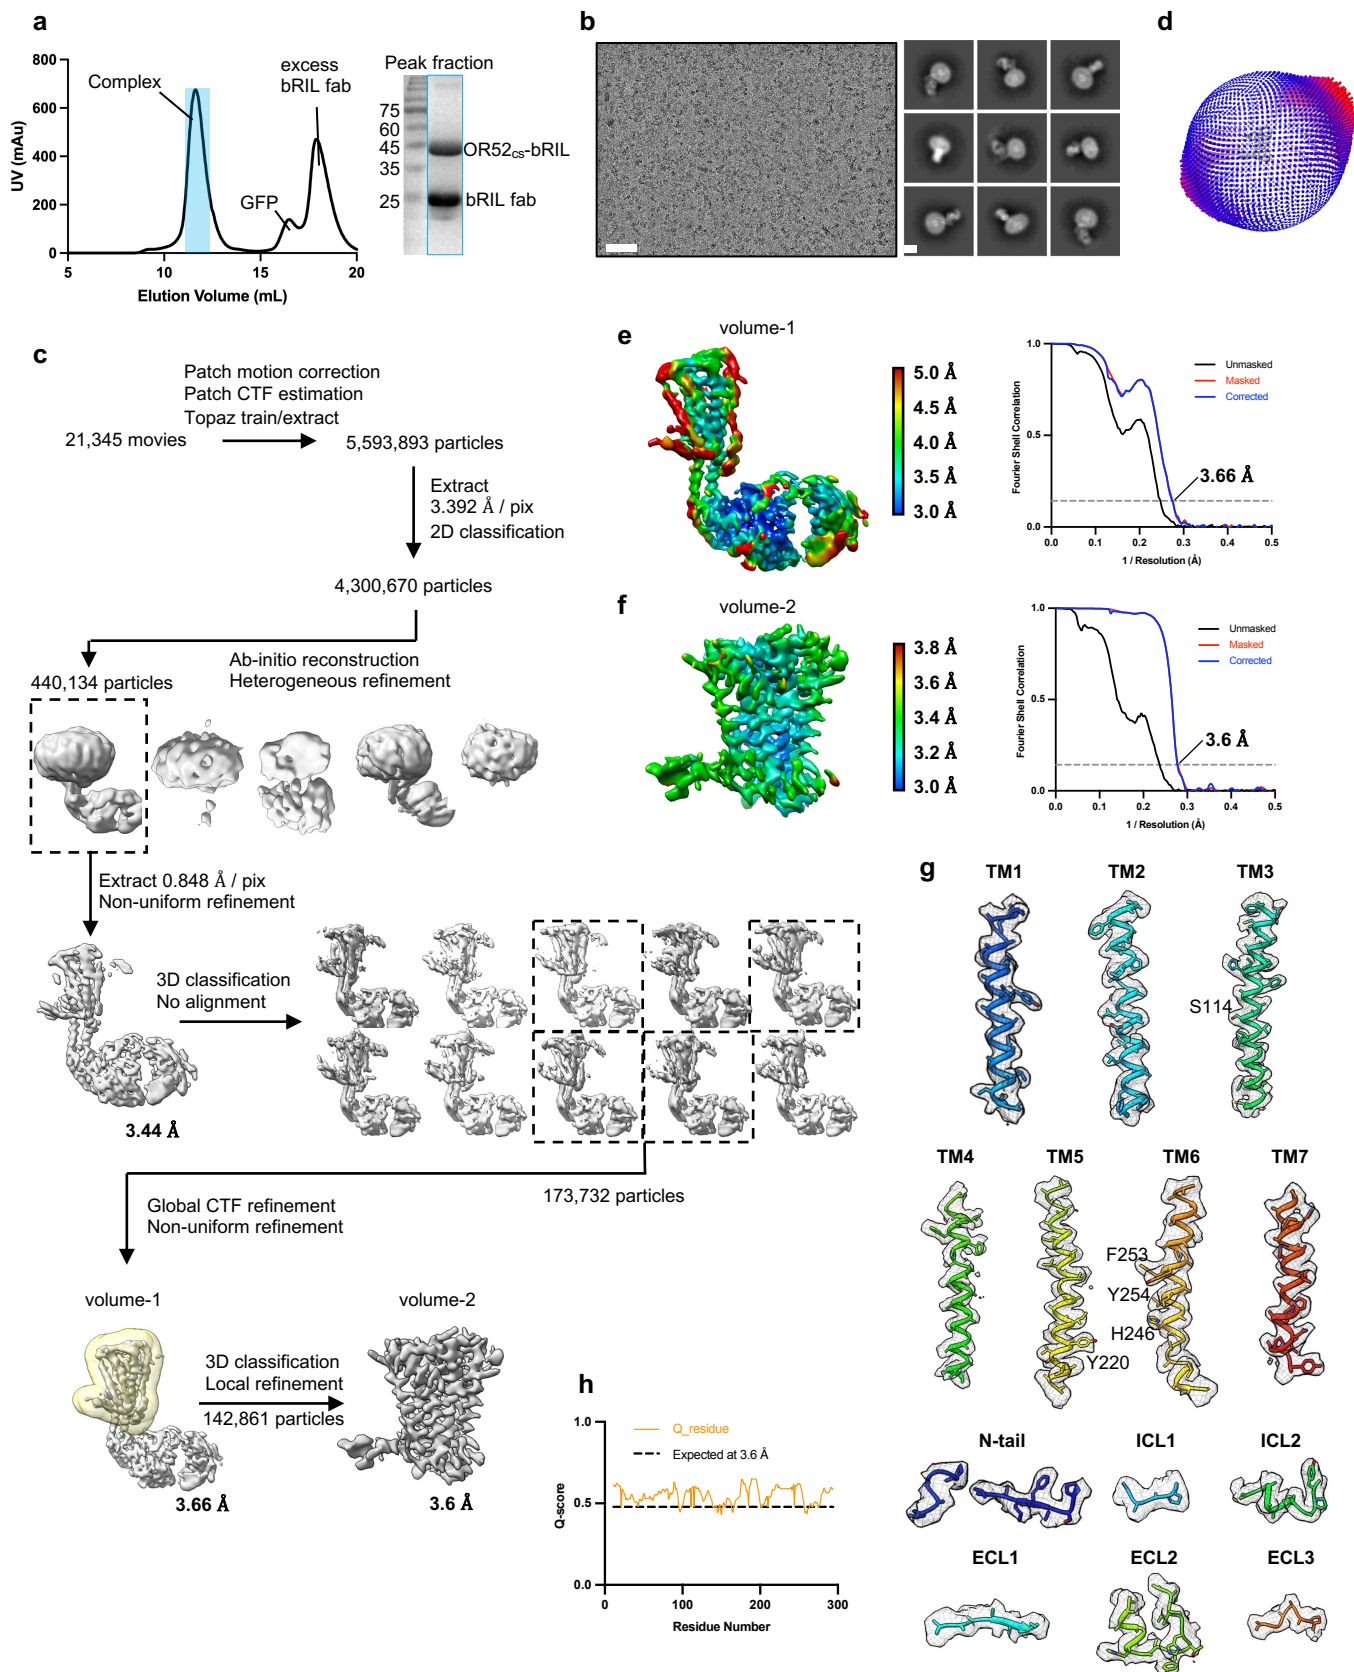

**Supplementary Fig. 10| Cryo-EM data analysis of OR52<sub>cs</sub>-bRIL-Fab complex.** **a** SEC profile (left) and SDS-PAGE (right) of purified OR52<sub>cs</sub>-bRIL-Fab complex. **b** Representative motion-corrected micrograph (scale bar, 50 nm) and 2D average classes (scale bar, 5 nm). **c** Flowchart of data processing using cryoSPARC v4.2.0. **d** The Euler angle distribution of final reconstructed local refinement map. **e-f** Cryo-EM maps colored by local resolution of Non-uniform refinement (**e**) and receptor-focused local refinement (**f**). FSC curve was calculated and exported from RELION v3.1.1<sup>8</sup>. **g** Density representation of TMs, N-tail, ECL1-3, ICL1-2 are shown. Key residues presented in **Fig. 5c, d** are labeled. **h** Q-scores estimated from final locally-refined map and model using MapQ v1.9.9 are plotted with expected Q-score value at 3.6 Å resolution<sup>9</sup>.

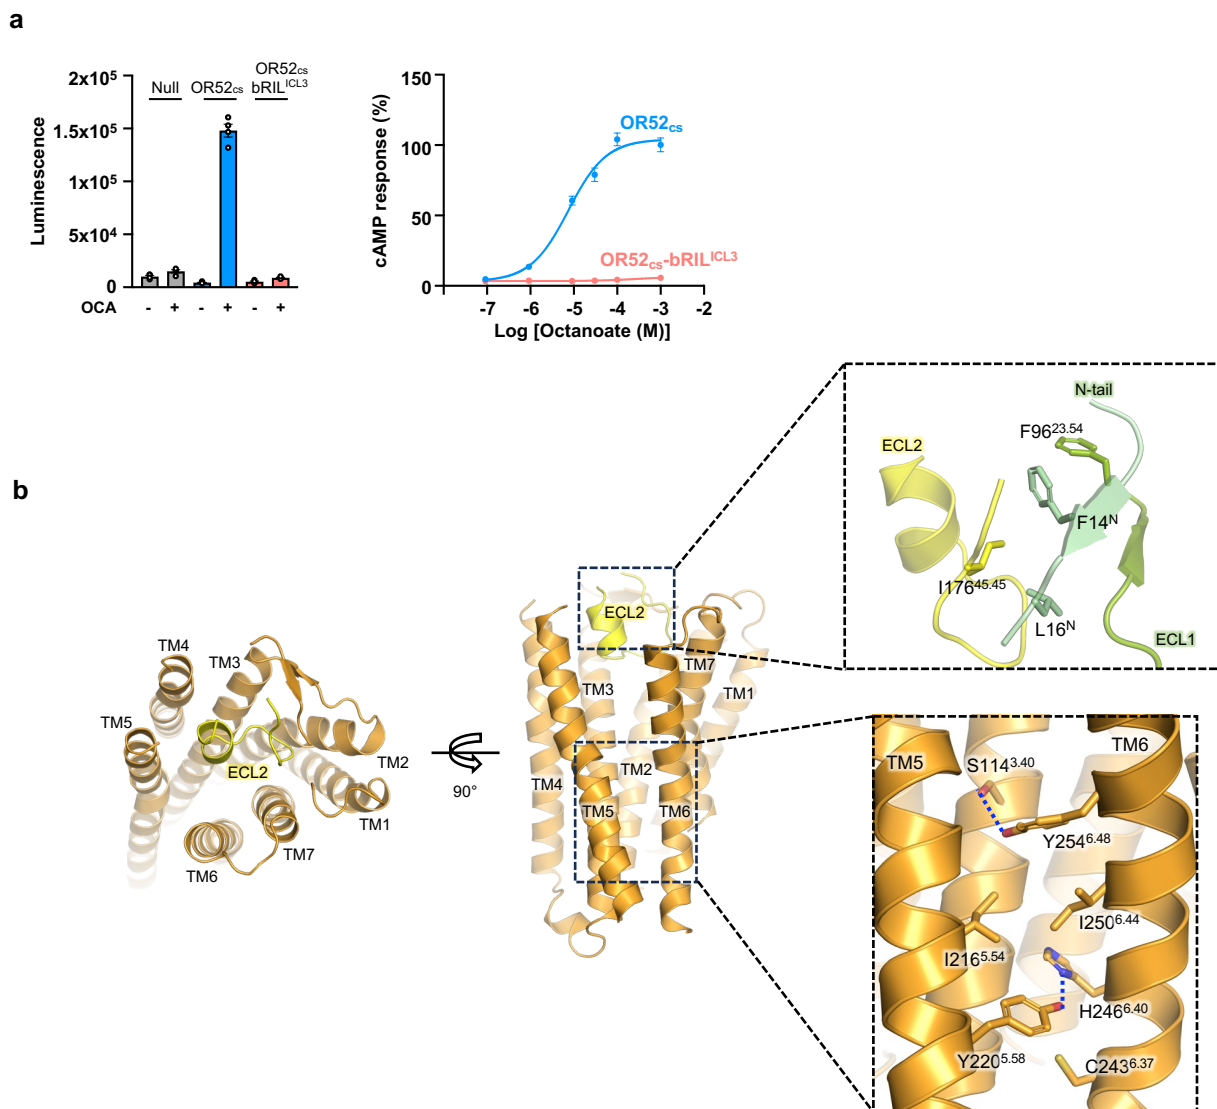

**Supplementary Fig. 11| Structural feature of ECL2 in apo state OR52<sub>cs</sub>.** **a** Basal and odorant induced activities of OR52<sub>cs</sub> and OR52<sub>cs</sub>-bRIL<sup>ICL3</sup> are assessed by cAMP responses upon DMSO or 1 mM OCA treatment (left). Dose-dependent cAMP response of each construct is presented (right). For each data, error bars indicate the standard error of the mean (S.E.M.) from n=4 independent experiments, respectively, and symbols indicate individual values. **b** The interactions that stabilize the apo structure near ECL2 and the FYxP motif are shown. Polar interactions are represented as blue dashed lines. The same color codes as in **Fig. 2b** are used for ECL2, N-tail, and ECL1.

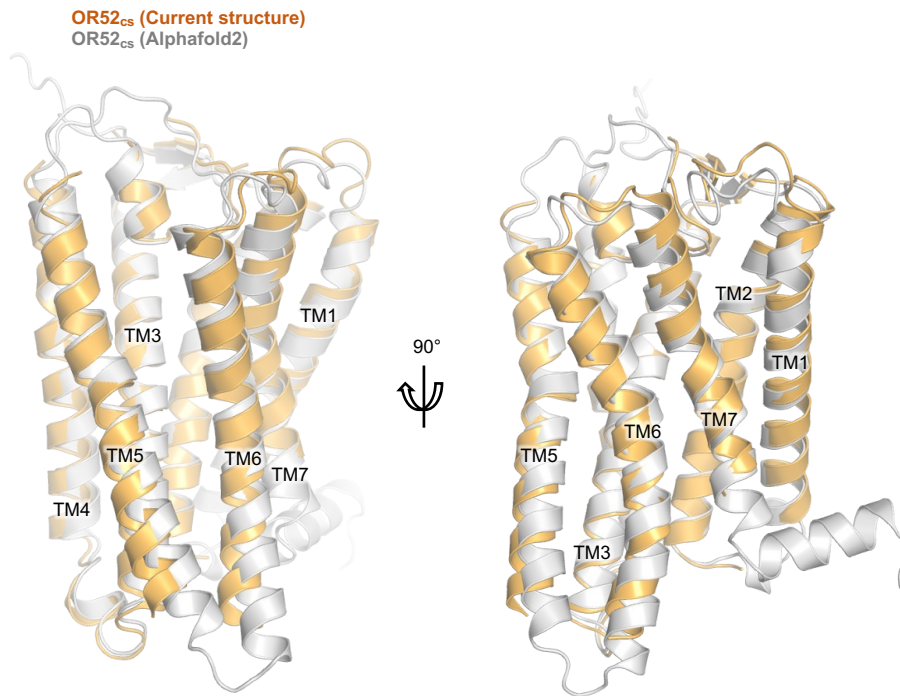

**Supplementary Fig. 12| AlphaFold2-generated model of the apo state OR52<sub>cs</sub>.** AlphaFold2 predicted model was aligned with our apo state OR52<sub>cs</sub> structure, with a RMSD of 1.1 Å for 242 C $\alpha$  atoms.

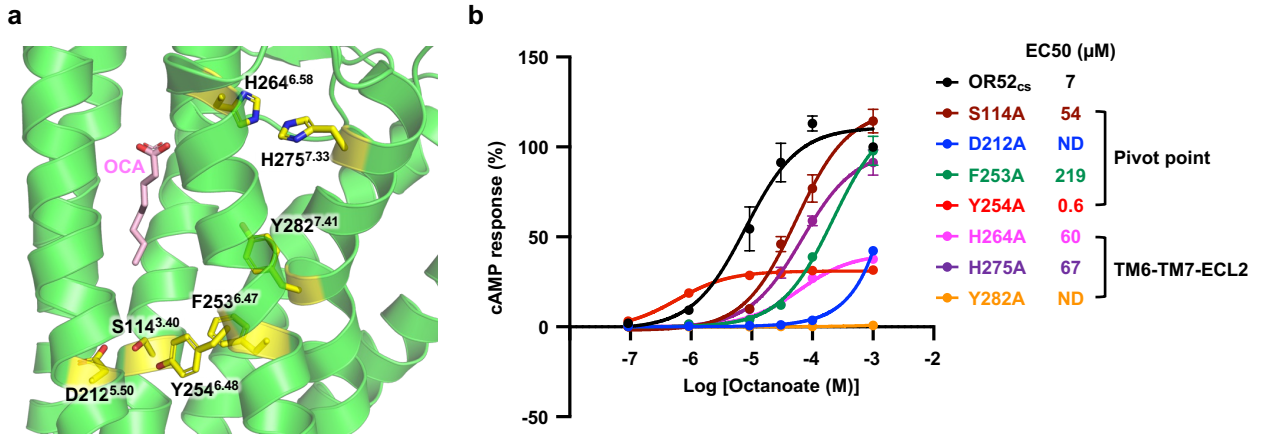

**Supplementary Fig. 13| Mutagenesis of residues important for activation of OR52<sub>cs</sub>.** **a.** Residues which are not directly involved in odorant binding but stabilize active state are shown as yellow sticks. **b.** cAMP response curve of alanine mutants for residues highlighted in **a**. For each data, symbols and error bars indicate the mean and the standard error of the mean (S.E.M.) from n=3 (for OR52<sub>cs</sub>, n=5) independent experiments, respectively.



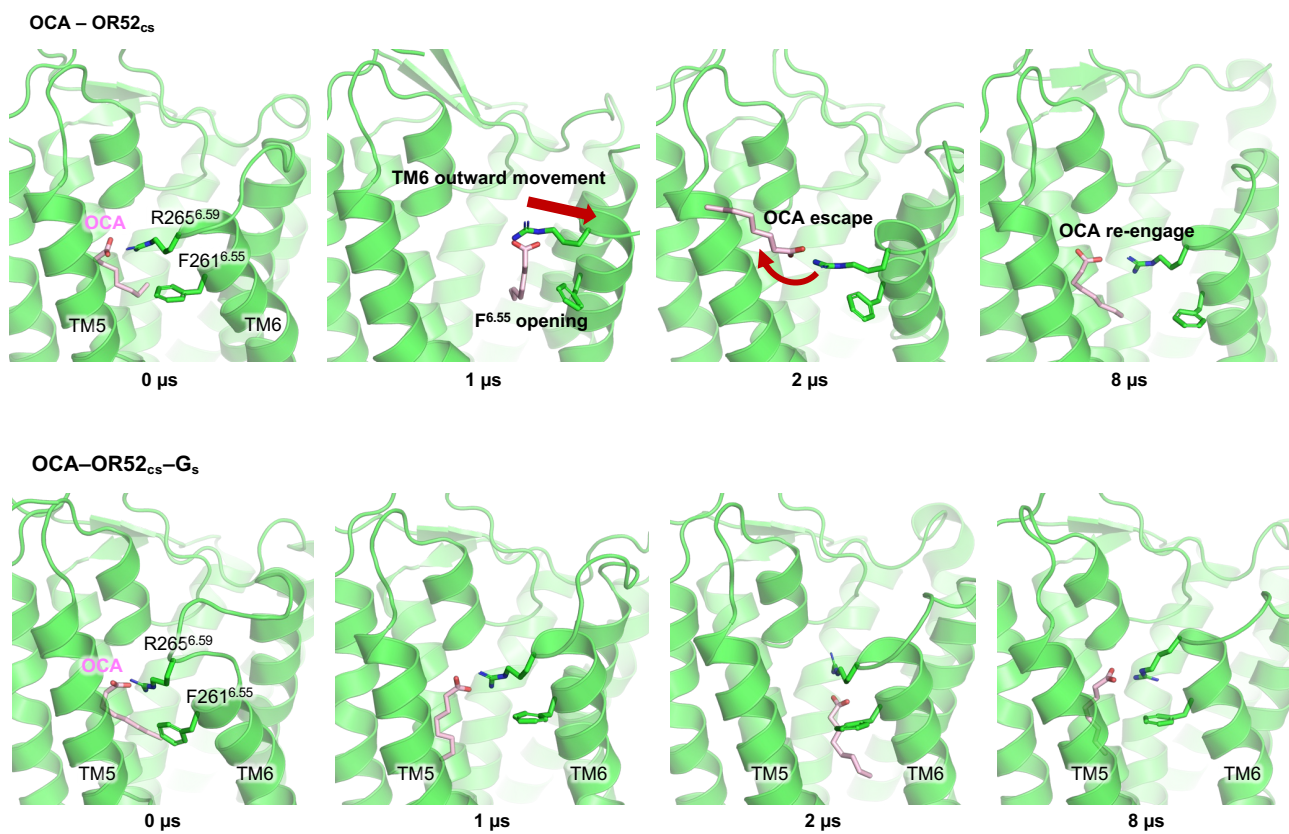

**Supplementary Fig. 14** | MD simulations of OCA–OR52<sub>cs</sub> with or without G<sub>s</sub>. Snapshots at 0, 1, 2, and 8  $\mu$ s are presented for each simulation, with OCA, F261<sup>6.55</sup>, and R265<sup>6.59</sup> shown as sticks.

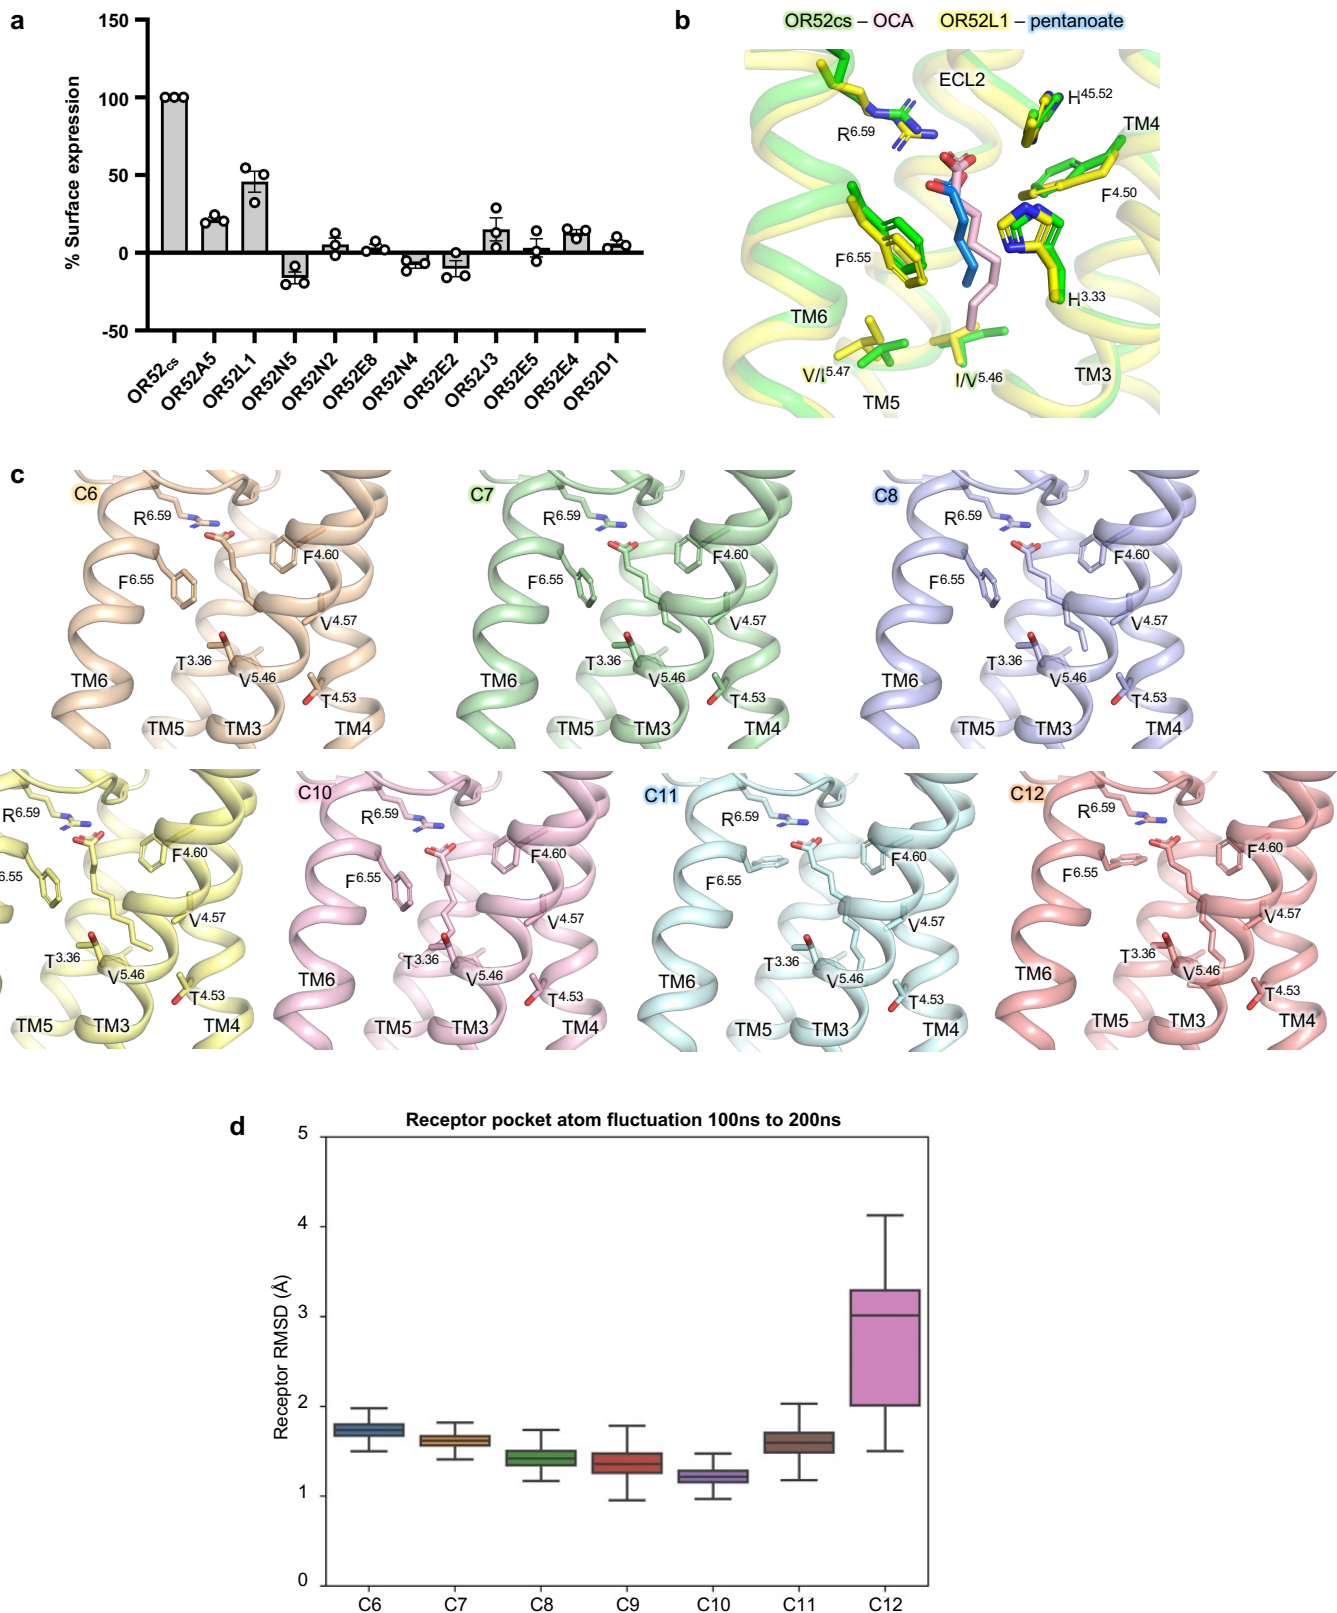

**Supplementary Fig. 15| Structural modeling of pentanoate-OR52L1 and OR52E5 with fatty acids of different lengths.** **a** Quantification of surface expression of native OR52 family members by surface ELISA. For each data, error bars indicate the standard error of the mean (S.E.M.) of three independent experiments, respectively, and symbols indicate individual values. **b** Structural alignment between OCA-OR52<sub>cs</sub> and pentanoate-OR52L1 model. **c** Modeling of carboxylate (C6 to C12) bound OR52E5. **d** Fluctuations of the pocket residues in each carboxylate-bound OR52E5 model during 100-200 ns MD simulations are displayed.

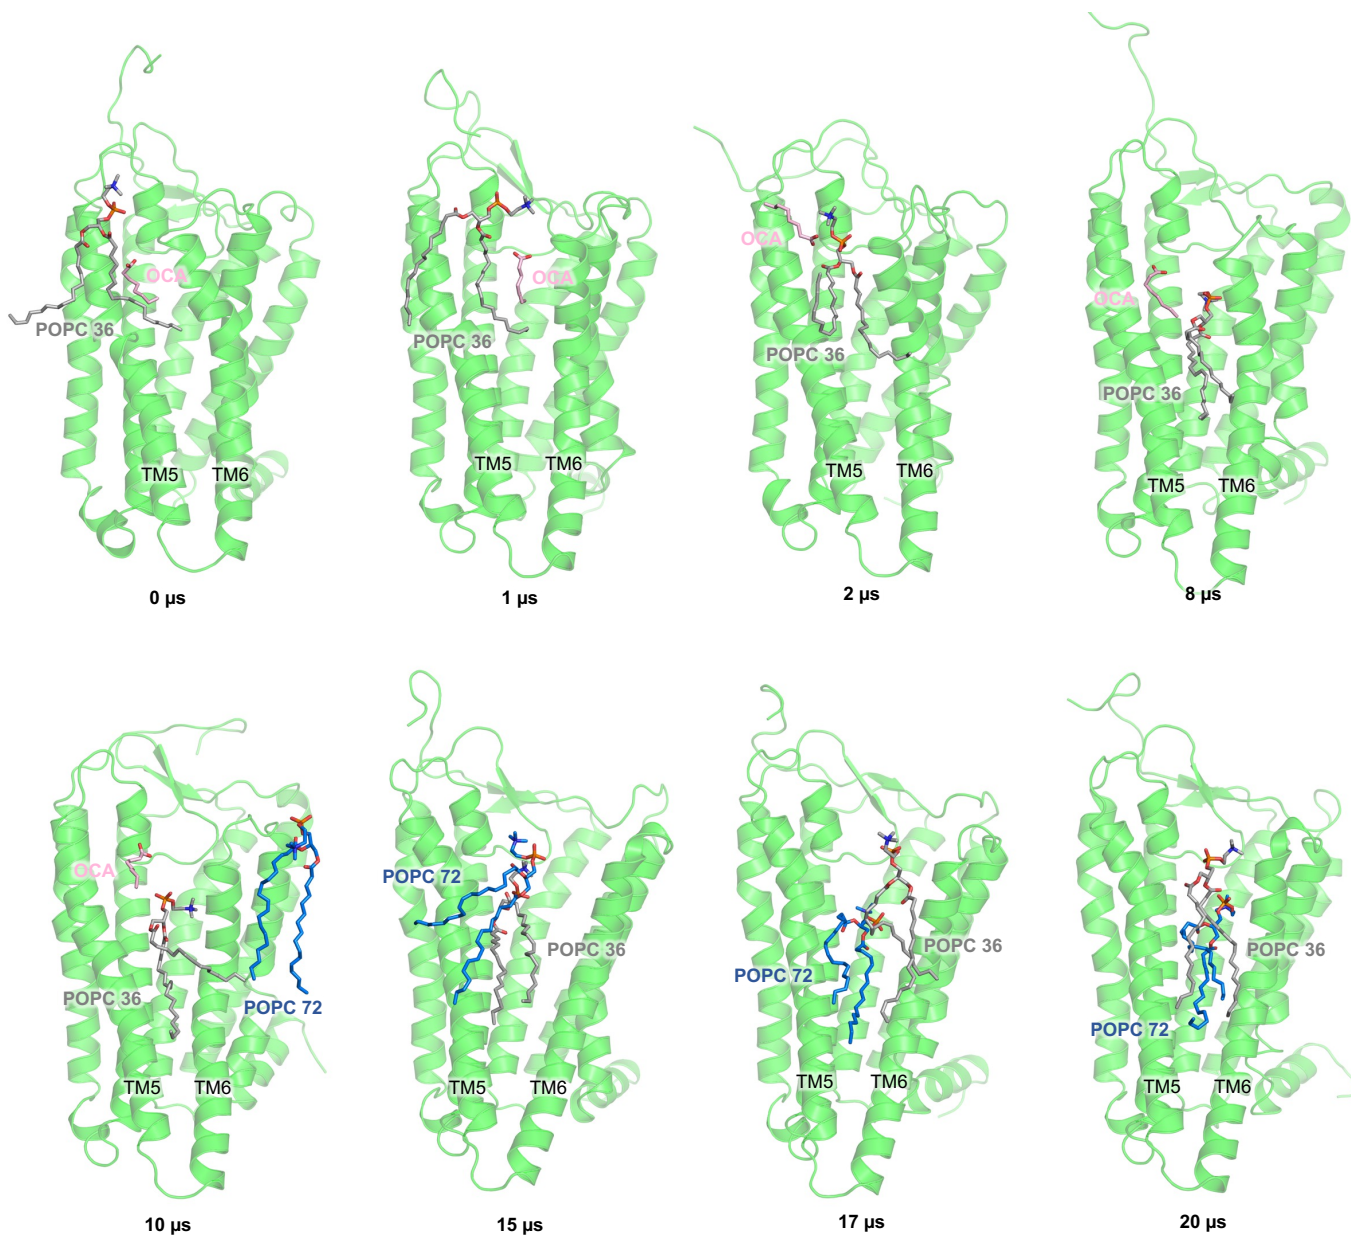

**Supplementary Fig. 16| Entrance and exchange of phospholipids during 20  $\mu$ s MD simulation of OCA-OR52<sub>cs</sub>.**

Entrance of phospholipid (POPC36) into OR52<sub>cs</sub> through the opening between TM5 and TM6 was observed in 2  $\mu$ s simulation. After the total escape of OCA, another phospholipid (POPC72) entered OR52<sub>cs</sub> while pushing POPC36 out in 17  $\mu$ s. The presence of POPC72 in OR52<sub>cs</sub> was observed until the end of the simulation (20  $\mu$ s).

**Supplementary Table. 1| Crystallographic statistics of G $\alpha_{olf}$** 

---

*Data collection*

---

|                                          |                                  |
|------------------------------------------|----------------------------------|
| wavelength (Å)                           | 0.9794                           |
| Space group                              | P2 <sub>1</sub>                  |
| Unit cell parameters (a, b, c, $\beta$ ) | 121.7 Å, 52.4 Å, 125.5 Å, 118.5° |
| Resolution (Å) (last shell)              | 27 - 2.9 (3.0 - 2.9)             |
| Unique reflections                       | 30932 (3030)                     |
| Completeness (%)                         | 99.4 (99.8)                      |
| Multiplicity                             | 3.4 (3.5)                        |
| I/ $\sigma$ (I)                          | 7.1 (1.5)                        |
| R <sub>merge</sub> <sup>a</sup>          | 0.178 (0.808)                    |
| CC <sub>1/2</sub> <sup>b</sup>           | 0.983 (0.67)                     |

---

*Refinement*

---

|                                                    |              |
|----------------------------------------------------|--------------|
| No. of reflections working set (test set)          | 30932 (1547) |
| R <sub>work</sub> / R <sub>free</sub> <sup>c</sup> | 0.23 / 0.27  |
| bond length rmsd from ideal (Å)                    | 0.002        |
| bond angle rmsd from ideal (°)                     | 0.56         |
| Ramachandran analysis <sup>d</sup>                 |              |
| % favored regions                                  | 98.02        |
| % allowed regions                                  | 1.98         |
| % outliers                                         | 0            |

---

<sup>a</sup>  $R_{\text{merge}} = \frac{\sum_h \sum_i |I_i(h) - \langle I(h) \rangle|}{\sum_h \sum_i I_i(h)}$ , where  $I_i(h)$  is the  $i$ th measurement of reflection  $h$ , and  $\langle I(h) \rangle$  is the weighted mean of all measurements of  $h$ .

<sup>b</sup>CC<sub>1/2</sub> : Pearson correlation coefficient between random half-datasets<sup>10</sup>.

<sup>c</sup>R =  $\frac{\sum_h |F_{\text{obs}}(h)| - |F_{\text{calc}}(h)|}{\sum_h |F_{\text{obs}}(h)|}$ . R<sub>work</sub> and R<sub>free</sub> were calculated using the working and test reflection sets, respectively.

<sup>d</sup>As defined in MolProbity<sup>11</sup>.

---

**Supplementary Table. 2 | Cryo-EM data collection, refinement and validation statistics**

|                                                  | OCA-OR52 <sub>cs</sub> -G <sub>s</sub> -Nb35 | Apo state OR52 <sub>cs</sub> |                     |
|--------------------------------------------------|----------------------------------------------|------------------------------|---------------------|
| Composite map                                    | EMD-35010                                    | EMD-35971                    |                     |
| Consensus map                                    | EMD-35770                                    |                              |                     |
| OR52 <sub>cs</sub> -focused map                  | EMD-35772                                    | EMD-37336                    |                     |
| G <sub>s</sub> -focused map                      | EMD-35773                                    |                              |                     |
| PDB                                              | PDB 8HTI                                     | With bRIL<br>PDB 8J46        | No bRIL<br>PDB 8W77 |
| <b>Data collection and processing</b>            |                                              |                              |                     |
| Magnification                                    | 105,000                                      | 105,000                      |                     |
| Voltage (kV)                                     | 300                                          | 300                          |                     |
| Electron exposure (e-/Å <sup>2</sup> )           | 60                                           | 68.5                         |                     |
| Defocus range (µm)                               | -0.8 to -2.0                                 | -0.7 to -1.9                 |                     |
| Pixel size (Å)                                   | 0.851238                                     | 0.848                        |                     |
| Symmetry imposed                                 | C1                                           | C1                           |                     |
| Initial particle images (no.)                    | 493,826                                      | 5,594,893                    |                     |
| Final particle images (no.)                      | 126,896                                      | 173,732                      | 142,861             |
| Map resolution (Å)                               | 2.97                                         | 3.66                         | 3.60                |
| FSC threshold                                    | 0.143                                        | 0.143                        | 0.143               |
| <b>Refinement</b>                                |                                              |                              |                     |
| Initial model used (PDB code)                    | Alphafold2, 3SN6                             | Alphafold2                   | Alphafold2, 6WW2    |
| Model resolution (Å)                             | 3.10                                         | 3.80                         | 3.50                |
| FSC threshold                                    | 0.143                                        | 0.143                        | 0.143               |
| Model resolution range (Å)                       | n/a                                          | n/a                          | n/a                 |
| Map sharpening <i>B</i> factor (Å <sup>2</sup> ) | -77.6                                        | -124.9                       | -136.3              |
| Model composition                                |                                              |                              |                     |
| Non-hydrogen atoms                               | 7,393                                        | 2,158                        | 1,601               |
| Protein residues                                 | 962                                          | 362                          | 260                 |
| Ligands                                          | OCA: 1                                       | n/a                          | n/a                 |
| B factors (Å <sup>2</sup> )                      |                                              |                              |                     |
| Protein                                          | 49.15                                        | 181.08                       | 170.24              |
| Ligand                                           | 42.68                                        | n/a                          | n/a                 |
| R.m.s. deviations                                |                                              |                              |                     |
| Bond lengths (Å)                                 | 0.004                                        | 0.005                        | 0.005               |
| Bond angles (°)                                  | 0.600                                        | 1.133                        | 1.141               |
| Validation                                       |                                              |                              |                     |
| MolProbity score                                 | 1.50                                         | 0.68                         | 0.73                |
| Clashscore                                       | 5.94                                         | 0.54                         | 0.72                |
| Poor rotamers (%)                                | 0.00                                         | 0.00                         | 0.00                |
| Ramachandran plot                                |                                              |                              |                     |
| Favored (%)                                      | 97.02                                        | 99.14                        | 99.19               |
| Allowed (%)                                      | 2.98                                         | 0.86                         | 0.81                |
| Disallowed (%)                                   | 0.00                                         | 0.00                         | 0.00                |



| OR52 <sub>cs</sub><br>Mutants | Octanoate (OCA)                                    |   |                                   | Surface<br>Expression (%) |
|-------------------------------|----------------------------------------------------|---|-----------------------------------|---------------------------|
|                               | EC <sub>50</sub> (μM)<br>(pEC <sub>50</sub> ± SEM) | N | X-fold over<br>OR52 <sub>cs</sub> |                           |
| OR52 <sub>cs</sub>            | 7.9<br>(5.230 ± 0.107)                             | 5 | 1                                 | 100                       |
| H107 <sup>3.33A</sup>         | 187<br>(2.380 ± 0.092)                             | 3 | 23.7                              | 91.7 ± 9.3                |
| T110 <sup>3.36A</sup>         | 22.7<br>(4.293 ± 0.098)                            | 3 | 2.9                               | 89.0 ± 3.5                |
| F161 <sup>4.60A</sup>         | 42.0<br>(4.214 ± 0.075)                            | 3 | 5.3                               | 110.6 ± 3.5               |
| H183 <sup>45.52A</sup>        | 41.4<br>(4.154 ± 0.087)                            | 3 | 3.2                               | 112.3 ± 3.0               |
| G201 <sup>5.39A</sup>         | ND                                                 | 3 | -                                 | 116.4 ± 6.8               |
| I208 <sup>5.46A</sup>         | 5.1<br>(5.321 ± 0.119)                             | 3 | 0.65                              | 94.2 ± 3.9                |
| F261 <sup>6.55A</sup>         | 506<br>( 3.326 ± 1.547)                            | 3 | 64.0                              | 132.6 ± 12.1              |
| R265 <sup>6.59A</sup>         | ND                                                 | 3 | -                                 | 163.7 ± 7.2               |
| ΔN(1-18)                      | ND                                                 | 3 | -                                 | 25.6 ± 7.1                |
| F14A/F96A<br>/F170A           | 208                                                | 3 | 26.3                              | 63.7 ± 4.0                |

**Supplementary Table. 3| EC<sub>50</sub> of OR52<sub>cs</sub> and mutants for octanoate.** EC<sub>50</sub> (pEC<sub>50</sub> ± SEM) values of OR52<sub>cs</sub> and mutants were measured by cAMP assay with octanoate (OCA) as an odorant. Dose-response curves for each dataset are presented in **Figure 3d**. The number of independent experiments for estimating EC<sub>50</sub> value is displayed in the third column (N). For each mutant, relative fold of EC<sub>50</sub> over OR52<sub>cs</sub> is shown in the last column (X-fold over OR52<sub>cs</sub>). Surface expression level of each mutant was quantified by surface ELISA and normalized by OR52<sub>cs</sub>.

| Active state          |              |                       | TM6 Residue          | Apo state             |                      |                       |
|-----------------------|--------------|-----------------------|----------------------|-----------------------|----------------------|-----------------------|
| Interaction character | Distance (Å) | Interacting Residue   |                      | Interacting Residue   | Distance (Å)         | Interaction character |
| Polar (backbone)      | 3.2          | I198 <sup>5.36</sup>  | R265 <sup>6.59</sup> | I198 <sup>5.36</sup>  | No interaction       |                       |
| van der Waals         | 4.0          | I198 <sup>5.36</sup>  |                      | I198 <sup>5.36</sup>  |                      |                       |
| van der Waals         | 3.9          | L202 <sup>5.40</sup>  |                      | L202 <sup>5.40</sup>  |                      |                       |
| Hydrogen bond         | 3.9          | H178 <sup>45.47</sup> | H264 <sup>6.58</sup> | H178 <sup>45.47</sup> | No interaction       |                       |
| Hydrogen bond         | 2.5          | E182 <sup>45.51</sup> |                      | E182 <sup>45.51</sup> |                      |                       |
| van der Waals         | 3.7          | M184 <sup>45.53</sup> |                      | M184 <sup>45.53</sup> |                      |                       |
| Hydrogen bond         | 3.2          | H275 <sup>7.33</sup>  |                      | H275 <sup>7.33</sup>  |                      |                       |
| van der Waals         | 3.9          | E182 <sup>45.51</sup> | F261 <sup>6.55</sup> | E182 <sup>45.51</sup> | No interaction       |                       |
| van der Waals         | 3.4          | V209 <sup>5.47</sup>  | F258 <sup>6.52</sup> | V209 <sup>5.47</sup>  | No interaction       |                       |
| van der Waals         | 3.6          | Y282 <sup>7.41</sup>  | P256 <sup>6.50</sup> | Y282 <sup>7.41</sup>  | No interaction       |                       |
| Hydrogen bond         | 2.8          | S114 <sup>3.40</sup>  | Y254 <sup>6.48</sup> | S114 <sup>3.40</sup>  | 3.9                  | Hydrogen bond         |
| van der Waals         | 3.4          | V209 <sup>5.47</sup>  |                      | V209 <sup>5.47</sup>  | No interaction       |                       |
| van der Waals         | 3.8          | V213 <sup>5.51</sup>  |                      | V213 <sup>5.51</sup>  |                      |                       |
| van der Waals         | 4.0          | T110 <sup>3.36</sup>  | F253 <sup>6.47</sup> | T110 <sup>3.36</sup>  | No interaction       |                       |
| van der Waals         | 4.1          | E113 <sup>3.39</sup>  |                      | E113 <sup>3.39</sup>  |                      |                       |
| van der Waals         | 4.0          | Y282 <sup>7.41</sup>  |                      | Y282 <sup>7.41</sup>  |                      |                       |
| van der Waals         | 3.7          | P286 <sup>7.45</sup>  |                      | P286 <sup>7.45</sup>  | 4.0                  | van der Waals         |
| van der Waals         | 4.3          | I216 <sup>5.54</sup>  | I250 <sup>6.44</sup> | I216 <sup>5.54</sup>  | 3.6                  | van der Waals         |
| van der Waals         | 4.0          | Y220 <sup>5.58</sup>  |                      | Y220 <sup>5.58</sup>  | 4.5                  | van der Waals         |
| van der Waals         | 3.3          | N290 <sup>7.49</sup>  | V249 <sup>6.43</sup> | N290 <sup>7.49</sup>  | 4.3                  | van der Waals         |
| van der Waals         | 3.6          | I293 <sup>7.52</sup>  |                      | I293 <sup>7.52</sup>  | 4.4                  | van der Waals         |
| No interaction        |              | Y294 <sup>7.53</sup>  |                      | Y294 <sup>7.53</sup>  | 3.6                  | van der Waals         |
| Polar                 | 2.8          | Y220 <sup>5.58</sup>  |                      | H246 <sup>6.40</sup>  | Y220 <sup>5.58</sup> | 2.8                   |
| van der Waals         | 3.9          | Y294 <sup>7.53</sup>  | Y294 <sup>7.53</sup> |                       | 3.8                  | van der Waals         |
| van der Waals         | 3.6          | Y220 <sup>5.58</sup>  | C243 <sup>6.37</sup> | Y220 <sup>5.58</sup>  | 3.1                  | Hydrogen bond         |

**Supplementary Table. 4| Key interactions of TM6 residues stabilizing the apo and active states of OR52<sub>cs</sub>.** Key interactions of TM6 residues stabilizing the apo and active states of OR52<sub>cs</sub> are compared in this table. Interactions between TM6 residues are not included. For each interaction, the distance (Å) and interaction character are displayed. Residues with no evident side chain are indicated as 'No interaction'.

| OR species         | TM3                  |                      |                      | TM4                  | ECL2                  | TM5                  |                      |                      |                      |                      | TM6                  |                      |                      | Sequence Identity (%) |       |
|--------------------|----------------------|----------------------|----------------------|----------------------|-----------------------|----------------------|----------------------|----------------------|----------------------|----------------------|----------------------|----------------------|----------------------|-----------------------|-------|
|                    | Pocket residues      |                      | Whole residues       |                      |                       |                      |                      |                      |                      |                      |                      |                      |                      |                       |       |
| OR52 <sub>cs</sub> | H107 <sup>3.33</sup> | T110 <sup>3.36</sup> | G111 <sup>3.37</sup> | F161 <sup>4.60</sup> | H183 <sup>45.52</sup> | G201 <sup>5.39</sup> | V204 <sup>5.42</sup> | A205 <sup>5.43</sup> | I208 <sup>5.46</sup> | V209 <sup>5.47</sup> | F258 <sup>6.52</sup> | F261 <sup>6.55</sup> | R265 <sup>6.59</sup> | 100                   | 100   |
| OR52N4             | H                    | T                    | G                    | F                    | H                     | G                    | V                    | A                    | I                    | W                    | F                    | F                    | R                    | 92.31                 | 64.01 |
| OR52N5             | H                    | T                    | G                    | F                    | H                     | G                    | V                    | A                    | I                    | G                    | F                    | F                    | R                    | 92.31                 | 63.28 |
| OR52N2             | H                    | T                    | G                    | F                    | H                     | G                    | V                    | A                    | I                    | G                    | F                    | F                    | R                    | 92.31                 | 61.78 |
| OR52E4             | H                    | T                    | G                    | F                    | H                     | G                    | V                    | I                    | I                    | I                    | F                    | F                    | R                    | 84.62                 | 70.61 |
| OR52H1             | H                    | F                    | V                    | D                    | H                     | G                    | V                    | P                    | T                    | V                    | F                    | I                    | R                    | 84.62                 | 60.91 |
| OR52N1             | H                    | T                    | G                    | S                    | H                     | G                    | V                    | A                    | I                    | G                    | F                    | F                    | H                    | 76.92                 | 60    |
| OR52J3             | H                    | T                    | G                    | M                    | H                     | G                    | V                    | V                    | F                    | V                    | V                    | F                    | R                    | 69.23                 | 64.94 |
| OR52A5             | H                    | Q                    | A                    | S                    | H                     | G                    | V                    | A                    | I                    | L                    | F                    | F                    | R                    | 69.23                 | 64.01 |
| OR52D1             | H                    | Y                    | A                    | F                    | H                     | G                    | V                    | A                    | A                    | M                    | F                    | F                    | R                    | 69.23                 | 63.81 |
| OR52E8             | H                    | T                    | A                    | L                    | H                     | G                    | N                    | I                    | L                    | L                    | F                    | F                    | R                    | 61.54                 | 73.16 |
| OR52E5             | H                    | T                    | G                    | F                    | H                     | G                    | A                    | F                    | V                    | G                    | L                    | F                    | R                    | 61.54                 | 66.77 |
| OR52K1             | H                    | S                    | I                    | L                    | H                     | G                    | V                    | A                    | I                    | V                    | V                    | S                    | R                    | 61.54                 | 63.87 |
| OR52K2             | H                    | S                    | I                    | L                    | H                     | G                    | V                    | A                    | I                    | V                    | V                    | S                    | R                    | 61.54                 | 63.26 |
| OR52A1             | H                    | Q                    | G                    | C                    | H                     | G                    | V                    | A                    | V                    | A                    | F                    | F                    | R                    | 61.54                 | 60.97 |
| OR52E6             | H                    | T                    | V                    | L                    | H                     | G                    | S                    | I                    | L                    | L                    | F                    | F                    | C                    | 53.85                 | 69.01 |
| OR52E2             | H                    | T                    | L                    | S                    | H                     | G                    | A                    | I                    | L                    | V                    | L                    | F                    | R                    | 53.85                 | 68.61 |
| OR52R1             | H                    | S                    | S                    | F                    | H                     | G                    | V                    | A                    | V                    | A                    | L                    | F                    | R                    | 53.85                 | 62.62 |
| OR52L1             | H                    | S                    | S                    | F                    | H                     | G                    | M                    | A                    | V                    | I                    | I                    | F                    | R                    | 53.85                 | 61.13 |
| OR52W1             | H                    | T                    | A                    | F                    | H                     | G                    | L                    | S                    | I                    | S                    | L                    | Y                    | R                    | 53.85                 | 49.68 |
| OR52B2             | H                    | F                    | V                    | V                    | H                     | G                    | V                    | P                    | M                    | V                    | F                    | L                    | H                    | 46.15                 | 65.81 |
| OR52B4             | H                    | F                    | I                    | I                    | H                     | G                    | I                    | L                    | T                    | V                    | I                    | I                    | R                    | 38.46                 | 61.34 |
| OR52B6             | H                    | L                    | F                    | S                    | H                     | G                    | A                    | A                    | S                    | T                    | L                    | V                    | R                    | 38.46                 | 60.13 |
| OR52A4             | H                    | Q                    | G                    | C                    | R                     | G                    | G                    | A                    | V                    | G                    | F                    | I                    | Q                    | 38.46                 | 55.38 |
| OR52M1             | H                    | A                    | T                    | L                    | H                     | G                    | I                    | G                    | V                    | L                    | A                    | S                    | R                    | 30.77                 | 59.53 |
| OR52I1             | H                    | T                    | A                    | L                    | H                     | S                    | G                    | S                    | M                    | V                    | M                    | I                    | W                    | 30.77                 | 51.48 |
| OR52I2             | H                    | T                    | A                    | L                    | H                     | S                    | G                    | S                    | M                    | V                    | M                    | I                    | W                    | 30.77                 | 51.48 |

**Supplementary Table. 5| Sequence alignment of residues around odorant binding pocket in the OR52 family.** The sequence alignment of human OR52 family members with OR52<sub>cs</sub>. Residues constituting odorant-binding pocket are presented. Sequence identity for each OR52 family member against OR52<sub>cs</sub> was presented, both for whole sequence and pocket residues.

**Supplementary Table. 6| Detailed system information of MD simulations.**

|                                      | OCA-OR52 <sub>cs</sub> -G <sub>s</sub> | OCA-OR52 <sub>cs</sub> | apo OR52 <sub>cs</sub> |
|--------------------------------------|----------------------------------------|------------------------|------------------------|
| Simulation box (Å <sup>3</sup> )     | 139 × 139 × 171                        | 91 × 91 × 113          | 90 × 90 × 116          |
| # atoms                              | 308,264                                | 85,555                 | 87,389                 |
| # water molecules                    | 221,229                                | 17,823                 | 18,441                 |
| Lipid composition                    | POPC:cholesterol (4:1)                 |                        |                        |
| Upper leaflet, # lipids, POPC        | 228                                    | 88                     | 88                     |
| Upper leaflet, # lipids, cholesterol | 57                                     | 22                     | 22                     |
| Lower leaflet, # lipids, POPC        | 224                                    | 88                     | 88                     |
| Lower leaflet, # lipids, cholesterol | 56                                     | 22                     | 22                     |
| Salt concentration (M), KCl          | 0.15                                   |                        |                        |

## References

- 1 Olender, T., Nativ, N. & Lancet, D. HORDE: comprehensive resource for olfactory receptor genomics. *Methods Mol. Biol.* **1003**, 23-38 (2013).
- 2 Crooks, G. E., Hon, G., Chandonia, J. M. & Brenner, S. E. WebLogo: a sequence logo generator. *Genome Res.* **14**, 1188-1190 (2004).
- 3 Isberg V, *et al.* Generic GPCR residue numbers - aligning topology maps while minding the gaps. *Trends Pharmacol. Sci.* **36**, 22-31 (2015).
- 4 Sunahara, R. K., Tesmer, J. J., Gilman, A. G. & Sprang, S. R. Crystal structure of the adenylyl cyclase activator Gsalpha. *Science* **278**, 1943-1947 (1997).
- 5 Punjani, A., Rubinstein, J. L., Fleet, D. J. & Brubaker, M. A. cryoSPARC: algorithms for rapid unsupervised cryo-EM structure determination. *Nat. Methods* **14**, 290-296 (2017).
- 6 Rubinstein, J. L. & Brubaker, M. A. Alignment of cryo-EM movies of individual particles by optimization of image translations. *J. Struct. Biol.* **192**, 188-195 (2015).
- 7 Pettersen, E. F. *et al.* UCSF ChimeraX: Structure visualization for researchers, educators, and developers. *Protein Sci.* **30**, 70-82 (2021).
- 8 Zivanov, J. *et al.* New tools for automated high-resolution cryo-EM structure determination in RELION-3. *eLife* **7**, e42166 (2018).
- 9 Pintilie, G., Zhang, K., Su, Z., Li, S., Schmid, M. F. & Chiu, W. Measurement of atom resolvability in cryo-EM maps with Q-scores. *Nat. Methods* **17**, 328-334 (2020).
- 10 Diederichs, K. & Karplus, P. A. Better models by discarding data? *Acta Crystallogr. Sect. D. Biol. Crystallogr.* **69**, 1215-1222 (2013).
- 11 Chen, V. B. *et al.* MolProbity: all-atom structure validation for macromolecular crystallography. *Acta Crystallogr. Sect. D. Biol. Crystallogr.* **66**, 12-21 (2010).



## [MD simulation checklist]

| Reliability and reproducibility checklist for molecular dynamics simulations<br>*All boxes must be marked YES by acceptance unless "Response not needed if No".                                                                                                                                                        | Yes                                                                                                  | No                                  | Response<br>(Please state where this information can be found in the text)                                                                                                                                                                                                                                                                                                                                                                                                                                                                                                                 |
|------------------------------------------------------------------------------------------------------------------------------------------------------------------------------------------------------------------------------------------------------------------------------------------------------------------------|------------------------------------------------------------------------------------------------------|-------------------------------------|--------------------------------------------------------------------------------------------------------------------------------------------------------------------------------------------------------------------------------------------------------------------------------------------------------------------------------------------------------------------------------------------------------------------------------------------------------------------------------------------------------------------------------------------------------------------------------------------|
| <b>1. Convergence of simulations and analysis</b>                                                                                                                                                                                                                                                                      |                                                                                                      |                                     |                                                                                                                                                                                                                                                                                                                                                                                                                                                                                                                                                                                            |
| 1a. Is an evaluation presented in the text to show that the property being measured has equilibrated in the simulations (e.g. time-course analysis)?                                                                                                                                                                   | <input checked="" type="checkbox"/>                                                                  | <input type="checkbox"/>            | In the Methods section, the following sentence has been added with a reference.<br>Line 555: "Following the CHARMM-GUI six-step equilibration procedure."                                                                                                                                                                                                                                                                                                                                                                                                                                  |
| 1b. Then, is it described in the text how simulations are split into equilibration and production runs and how much data were analyzed from production runs?                                                                                                                                                           | <input checked="" type="checkbox"/>                                                                  | <input type="checkbox"/>            | In the Methods section, the following sentence has been added with a reference.<br>Line 555: "Following the CHARMM-GUI six-step equilibration procedure."                                                                                                                                                                                                                                                                                                                                                                                                                                  |
| 1c. Are there at least 3 simulations per simulation condition with statistical analysis?                                                                                                                                                                                                                               | <input checked="" type="checkbox"/>                                                                  | <input type="checkbox"/>            | We used 5 replicas, which can be confirmed in Figures 3e and 4c, as well as in the Methods section (Line 562: "Simulations were performed at least 1 $\mu$ s for five replicas"). For Anton2 simulation, we conducted single 10 $\mu$ s and 20 $\mu$ s all-atom MD simulations for OCA-OR52 <sub>cs</sub> -G <sub>s</sub> and OCA-OR52 <sub>cs</sub> , respectively. Although we conducted extensive simulations for these systems, the sampling may vary when reproduced.                                                                                                                 |
| 1d. Is evidence provided in the text that the simulation results presented are independent of initial configuration?                                                                                                                                                                                                   | <input checked="" type="checkbox"/>                                                                  | <input type="checkbox"/>            | It can be seen in Figures 3e and 4c.                                                                                                                                                                                                                                                                                                                                                                                                                                                                                                                                                       |
| <b>2. Connection to experiments</b>                                                                                                                                                                                                                                                                                    |                                                                                                      |                                     |                                                                                                                                                                                                                                                                                                                                                                                                                                                                                                                                                                                            |
| 2a. Are calculations provided that can connect to experiments (e.g. loss or gain in function from mutagenesis, binding assays, NMR chemical shifts, J-couplings, SAXS curves, interaction distances or FRET distances, structure factors, diffusion coefficients, bulk modulus and other mechanical properties, etc.)? | <input checked="" type="checkbox"/>                                                                  | <input type="checkbox"/>            | Calculations (Figure 3e) can be connected to reduced cAMP responses in Figure 3d.                                                                                                                                                                                                                                                                                                                                                                                                                                                                                                          |
| <b>3. Method choice</b>                                                                                                                                                                                                                                                                                                |                                                                                                      |                                     |                                                                                                                                                                                                                                                                                                                                                                                                                                                                                                                                                                                            |
| 3a. Do simulations contain membranes, membrane proteins, intrinsically disordered proteins, glycans, nucleic acids, polymers, or cryptic ligand binding?                                                                                                                                                               | <input checked="" type="checkbox"/>                                                                  | <input type="checkbox"/>            | Simulations contain membranes and membrane proteins as described in the Methods section.<br>Line 544: "The receptor was embedded into a model membrane composed of 1-palmitoyl-2-oleoyl-sn-glycero-3-phosphocholine (POPC) and cholesterol (4:1)."                                                                                                                                                                                                                                                                                                                                         |
| 3b. Is it described in the text whether the accuracy of the chosen model(s) is sufficient to address the question(s) under investigation (e.g. all-atom vs. coarse-grained models, fixed charge vs. polarizable force fields, implicit vs. explicit solvent or membrane, force field and water model, etc.)?           | <input checked="" type="checkbox"/>                                                                  | <input type="checkbox"/>            | Force fields that are employed in this study were described in the Methods section.<br>Line 549: "The CHARMM36(m) force field was utilized for lipids and proteins, and CGenFF was used for the OCA ligand."<br>For a better understanding, we have changed "MD simulations" into "All-atom MD simulations" in the text.                                                                                                                                                                                                                                                                   |
| 3c. Is the timescale of the event(s) under investigation beyond the brute-force MD simulation timescale in this study that enhanced sampling methods are needed?                                                                                                                                                       | <input type="checkbox"/>                                                                             | <input checked="" type="checkbox"/> | MD simulation in this study does not require enhanced sampling methods.                                                                                                                                                                                                                                                                                                                                                                                                                                                                                                                    |
|                                                                                                                                                                                                                                                                                                                        | If YES, are the parameters and convergence criteria for the enhanced sampling method clearly stated? | <input type="checkbox"/>            | <input type="checkbox"/>                                                                                                                                                                                                                                                                                                                                                                                                                                                                                                                                                                   |
|                                                                                                                                                                                                                                                                                                                        | If NO, is the evidence provided in the text?                                                         | <input checked="" type="checkbox"/> | <input type="checkbox"/>                                                                                                                                                                                                                                                                                                                                                                                                                                                                                                                                                                   |
|                                                                                                                                                                                                                                                                                                                        |                                                                                                      |                                     | We performed free MD simulations, and the details are addressed in the Methods section.<br>Line 562: "Simulations were performed at least 1 $\mu$ s for five replicas using OpenMM simulation package."<br>Line 564: "longer time scale up to 20 $\mu$ s and 10 $\mu$ s for OCA-OR52 <sub>cs</sub> and OCA-OR52 <sub>cs</sub> -G <sub>s</sub> , respectively."                                                                                                                                                                                                                             |
| <b>4. Code and reproducibility</b>                                                                                                                                                                                                                                                                                     |                                                                                                      |                                     |                                                                                                                                                                                                                                                                                                                                                                                                                                                                                                                                                                                            |
| 4a. Is a table provided describing the system setup that includes simulation box dimensions, total number of atoms, total number of water molecules, salt concentration, lipid composition (number of molecules and type)?                                                                                             | <input checked="" type="checkbox"/>                                                                  | <input type="checkbox"/>            | We have properly updated the information in the Methods section and provided a table (Supplementary Table 6).<br>Line 541: "Three model systems were prepared for all-atom MD simulation: OCA-OR52 <sub>cs</sub> -G <sub>s</sub> (139 $\times$ 139 $\times$ 171 $\text{\AA}^3$ ), OCA-OR52 <sub>cs</sub> (91 $\times$ 91 $\times$ 113 $\text{\AA}^3$ ), and Apo OR52 <sub>cs</sub> (90 $\times$ 90 $\times$ 116 $\text{\AA}^3$ ), with the total numbers of atoms (and water molecules) of 308,264 (221,229), 85,555 (17,823), and 87,389 (18,441), respectively (Supplementary Table 6)." |
| 4b. Is it described in the text what simulation and analysis software and which versions are used?                                                                                                                                                                                                                     | <input checked="" type="checkbox"/>                                                                  | <input type="checkbox"/>            | Described in the Methods section, "All-atom MD simulations of apo and OCA-bound states of OR52 <sub>cs</sub> ".<br>Line 562: "Simulations were performed at least 1 $\mu$ s for five replicas using OpenMM simulation package."                                                                                                                                                                                                                                                                                                                                                            |
| 4c. Are other parameters for the system setup described in the text, such as protonation state, type of structural restraints if applied, nonbonded cutoff, thermostat and barostat, etc.?                                                                                                                             | <input checked="" type="checkbox"/>                                                                  | <input type="checkbox"/>            | Described in the Methods section, "All-atom MD simulations of apo and OCA-bound states of OR52 <sub>cs</sub> ".<br>Line 545: "For the G protein, three lipidations were introduced into the G $\alpha_s$ and G $\gamma$ proteins, i.e., N-myristoylation (Gly2 of G $\alpha_s$ ), S-palmitoylation (Cys3 of G $\alpha_s$ ), and S-geranylgeranylation (C68 of G $\gamma$ )."                                                                                                                                                                                                               |
| 4d. Are initial coordinate and simulation input files and a coordinate file of the final output provided as supplementary files or in a public repository?                                                                                                                                                             | <input checked="" type="checkbox"/>                                                                  | <input type="checkbox"/>            | We have provided a link.<br>Line 601: "The initial and final configurations obtained from 1- $\mu$ s all-atom MD simulations and extended simulations from Anton2 of all model systems are available at <a href="https://github.com/sek24/natcomm2023">https://github.com/sek24/natcomm2023</a> ."                                                                                                                                                                                                                                                                                         |
| 4e. Is there custom code or custom force field parameters?                                                                                                                                                                                                                                                             | <input type="checkbox"/>                                                                             | <input checked="" type="checkbox"/> | Response not needed if No                                                                                                                                                                                                                                                                                                                                                                                                                                                                                                                                                                  |
|                                                                                                                                                                                                                                                                                                                        | If YES, are they provided as supplementary files or in a public repository?                          | <input type="checkbox"/>            | <input type="checkbox"/>                                                                                                                                                                                                                                                                                                                                                                                                                                                                                                                                                                   |

<Uncropped gel for Supplementary Figure. 3a>

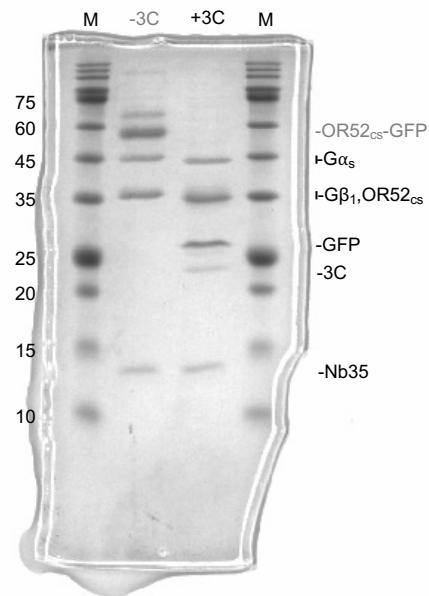

<Uncropped gel for Supplementary Figure. 10a>

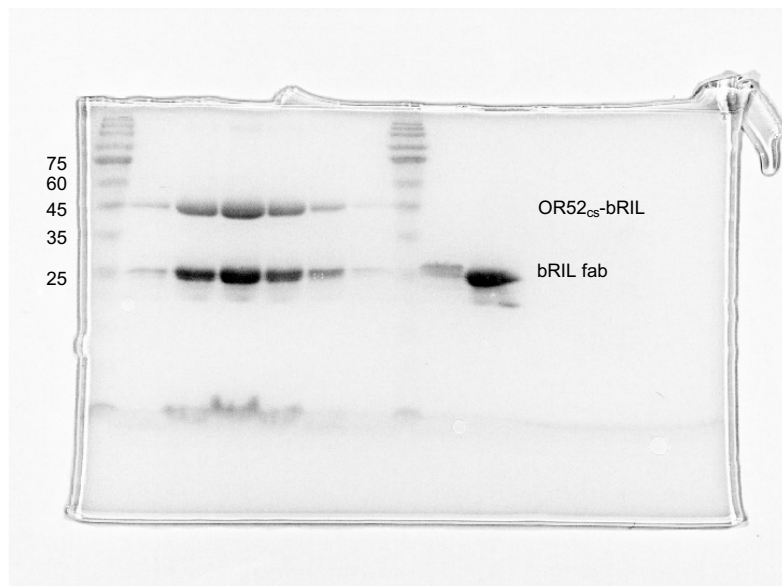

Supplement: 41467_2023_43983_MOESM1_ESM.pdf [file 41467_2023_43983_MOESM1_ESM.pdf]
