# Supplementary material for: Understanding the molecular mechanisms of odorant binding and activation of the human OR52 family
Source: PubMed Central journal article supplement (PMC10703812; doi:10.1038/s41467-023-43983-9), 2023-12-07
Supplement: 41467_2023_43983_MOESM3_ESM.pdf [file 41467_2023_43983_MOESM3_ESM.pdf]

## Reporting Summary

Nature Portfolio wishes to improve the reproducibility of the work that we publish. This form provides structure for consistency and transparency in reporting. For further information on Nature Portfolio policies, see our [Editorial Policies](#) and the [Editorial Policy Checklist](#).

### Statistics

For all statistical analyses, confirm that the following items are present in the figure legend, table legend, main text, or Methods section.

- | n/a                                 | Confirmed                                                                                                                                                                                                                                                                                      |
|-------------------------------------|------------------------------------------------------------------------------------------------------------------------------------------------------------------------------------------------------------------------------------------------------------------------------------------------|
| <input type="checkbox"/>            | <input checked="" type="checkbox"/> The exact sample size ( $n$ ) for each experimental group/condition, given as a discrete number and unit of measurement                                                                                                                                    |
| <input type="checkbox"/>            | <input checked="" type="checkbox"/> A statement on whether measurements were taken from distinct samples or whether the same sample was measured repeatedly                                                                                                                                    |
| <input checked="" type="checkbox"/> | <input type="checkbox"/> The statistical test(s) used AND whether they are one- or two-sided<br><i>Only common tests should be described solely by name; describe more complex techniques in the Methods section.</i>                                                                          |
| <input checked="" type="checkbox"/> | <input type="checkbox"/> A description of all covariates tested                                                                                                                                                                                                                                |
| <input type="checkbox"/>            | <input checked="" type="checkbox"/> A description of any assumptions or corrections, such as tests of normality and adjustment for multiple comparisons                                                                                                                                        |
| <input type="checkbox"/>            | <input checked="" type="checkbox"/> A full description of the statistical parameters including central tendency (e.g. means) or other basic estimates (e.g. regression coefficient) AND variation (e.g. standard deviation) or associated estimates of uncertainty (e.g. confidence intervals) |
| <input checked="" type="checkbox"/> | <input type="checkbox"/> For null hypothesis testing, the test statistic (e.g. $F$ , $t$ , $r$ ) with confidence intervals, effect sizes, degrees of freedom and $P$ value noted<br><i>Give <math>P</math> values as exact values whenever suitable.</i>                                       |
| <input checked="" type="checkbox"/> | <input type="checkbox"/> For Bayesian analysis, information on the choice of priors and Markov chain Monte Carlo settings                                                                                                                                                                      |
| <input checked="" type="checkbox"/> | <input type="checkbox"/> For hierarchical and complex designs, identification of the appropriate level for tests and full reporting of outcomes                                                                                                                                                |
| <input type="checkbox"/>            | <input checked="" type="checkbox"/> Estimates of effect sizes (e.g. Cohen's $d$ , Pearson's $r$ ), indicating how they were calculated                                                                                                                                                         |

*Our web collection on [statistics for biologists](#) contains articles on many of the points above.*

### Software and code

Policy information about [availability of computer code](#)

**Data collection** A diffraction data set of human olfactory G alpha subunit was collected at beamline 5C at the Pohang Accelerator Laboratory (PAL, KOREA). Data collection and refinement statistics are shown in Supplementary Table 1. Cryo-EM data of the OR52cs-bRIL-Fab complex and OCA-OR52cs-Gs-Nb35 complex were collected at the Institute of Basic Science (IBS, KOREA) and the Institute of Membrane Proteins (IMP, Korea), respectively. Cryo-EM data collection and refinement statistics are shown in Supplementary Table 2.

**Data analysis** The apo and active OR52cs data sets were motion-corrected, CTF estimation, 2D-averaging, 3D-refinement and local refinement using cryoSPARC 4.2.0 and cryoSPARC 3.3.2, respectively. Additionally, Topaz 0.2.4. for particle picking, RELION 3.1.1, MapQ 1.9.9, Coot 0.9.4, Phenix 1.19.1, MolProbity 4.5, XDS, Chimera 1.15, ChimeraX 1.2.5 and 1.6.1, Pymol 2.5.1, GraphPad Prism 9.4.1, MAFFT 7.475, Weblogo3, MEGAX 10.2.5, OpenMM, Amber20, CHARMM-GUI 3.6, Rosetta GALigandDock, Rosetta FastRelax, AlphaFold2 were used in this study.

For manuscripts utilizing custom algorithms or software that are central to the research but not yet described in published literature, software must be made available to editors and reviewers. We strongly encourage code deposition in a community repository (e.g. GitHub). See the Nature Portfolio [guidelines for submitting code & software](#) for further information.

## Data

Policy information about [availability of data](#)

All manuscripts must include a [data availability statement](#). This statement should provide the following information, where applicable:

- Accession codes, unique identifiers, or web links for publicly available datasets
- A description of any restrictions on data availability
- For clinical datasets or third party data, please ensure that the statement adheres to our [policy](#)

Final model and structure factor for the structure of olfactory G alpha protein are deposited in Protein Data Bank under accession number of 8HTG. The cryo-EM density map for the OCA-OR52cs-Gs-Nb35 complex and apo state OR52cs and OR52cs-bRIL have been submitted in the Electron Microscopy Data Bank (EMDB) under accession numbers of EMD-35010, EMD-35770, EMD-35772, EMD-35773, EMD-37336, and EMD-35971. And, their coordinates are deposited in Protein Data Bank under accession numbers of 8HTI, 8WW7, and 8J46, respectively. They will be released upon publication. Structural models used in data analysis were accessed from the Protein Data Bank under the accession number of 6WW2, 1AZT, 8F76, 3SN6, 6VMS, 6DDF, 2RH1, and 6LI1. Other data supporting this work are available from the corresponding author upon reasonable request. Source data are provided with this paper.

## Research involving human participants, their data, or biological material

Policy information about studies with [human participants or human data](#). See also policy information about [sex, gender \(identity/presentation\), and sexual orientation](#) and [race, ethnicity and racism](#).

Reporting on sex and gender

Reporting on race, ethnicity, or other socially relevant groupings

Population characteristics

Recruitment

Ethics oversight

Note that full information on the approval of the study protocol must also be provided in the manuscript.

## Field-specific reporting

Please select the one below that is the best fit for your research. If you are not sure, read the appropriate sections before making your selection.

Life sciences  Behavioural & social sciences  Ecological, evolutionary & environmental sciences

For a reference copy of the document with all sections, see [nature.com/documents/nr-reporting-summary-flat.pdf](https://www.nature.com/documents/nr-reporting-summary-flat.pdf)

## Life sciences study design

All studies must disclose on these points even when the disclosure is negative.

Sample size

Data exclusions

Replication

Randomization

Blinding

# Reporting for specific materials, systems and methods

We require information from authors about some types of materials, experimental systems and methods used in many studies. Here, indicate whether each material, system or method listed is relevant to your study. If you are not sure if a list item applies to your research, read the appropriate section before selecting a response.

## Materials & experimental systems

- n/a  Involved in the study
- Antibodies
- Eukaryotic cell lines
- Palaeontology and archaeology
- Animals and other organisms
- Clinical data
- Dual use research of concern
- Plants

## Methods

- n/a  Involved in the study
- ChIP-seq
- Flow cytometry
- MRI-based neuroimaging

## Antibodies

- Antibodies used
- Validation

## Eukaryotic cell lines

Policy information about [cell lines and Sex and Gender in Research](#)

- Cell line source(s)
- Authentication
- Mycoplasma contamination
- Commonly misidentified lines (See [ICLAC](#) register)

## Plants

- Seed stocks
- Novel plant genotypes
- Authentication
